# Supplementary material for: Coinage metal metallacycles involving a fluorinated 3,5-diarylpyrazolate
Source: Royal Society of Chemistry journal article supplement (doi:10.1039/d0nj03744c), 2020-01-01
Supplement: d0nj03744c1.pdf [file d0nj03744c1.pdf]

# **Coinage metal metallacycles involving a fluorinated 3,5- diarylpyrazolate**

Jaspreet S. Lakhi,<sup>†</sup> Monika R. Patterson,<sup>†</sup> H. V. Rasika Dias\*

*Department of Chemistry and Biochemistry, University of Texas at Arlington, Arlington, Texas  
76019, United States*

## **Supporting Information**

## NMR Spectra:

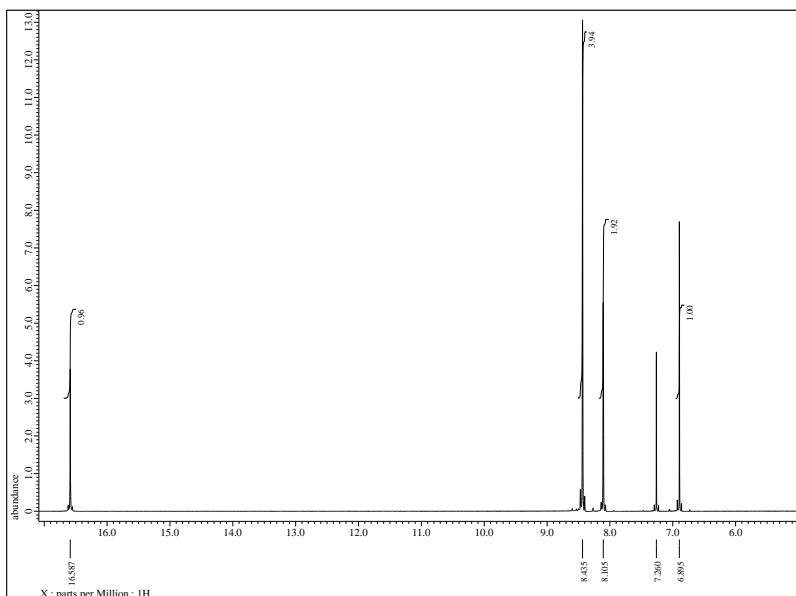

**Figure S1:**  $^1\text{H}$  NMR spectrum of 1,3-bis(3,5-bis(trifluoromethyl)phenyl)-3-hydroxyprop-2-en-1-one.

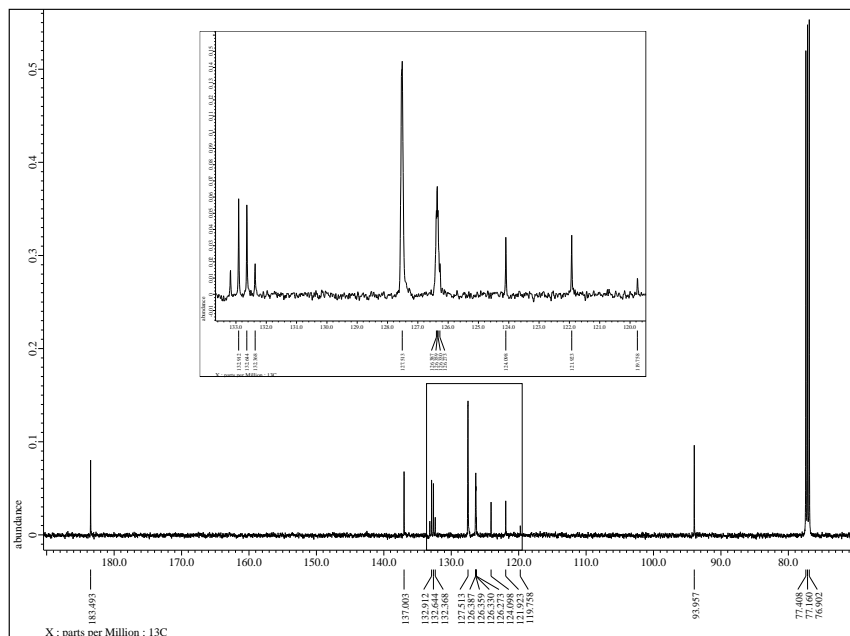

**Figure S2:**  $^{13}\text{C}$  { $^1\text{H}$ } NMR spectrum of 1,3-bis(3,5-bis(trifluoromethyl)phenyl)-3-hydroxyprop-2-en-1-one.

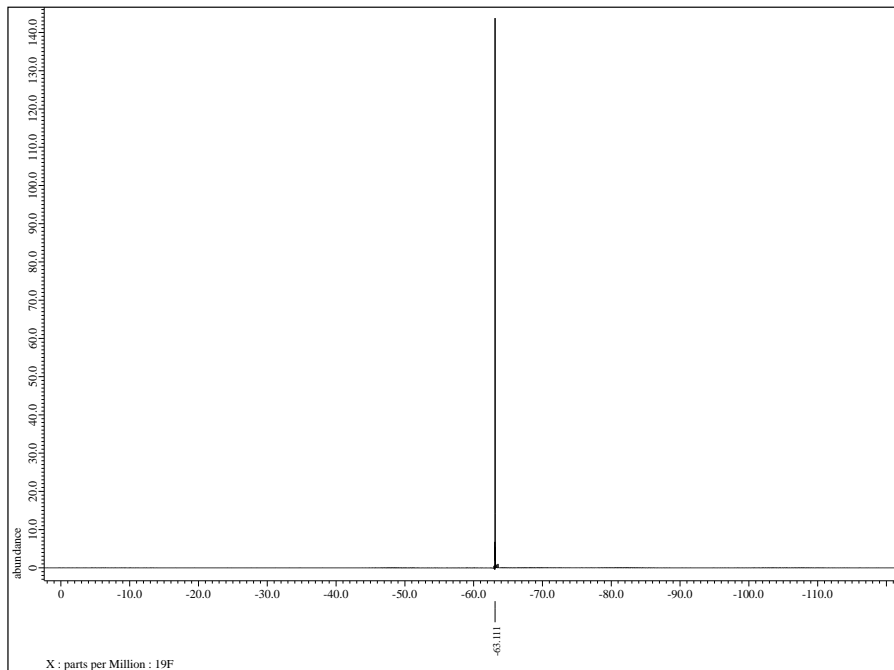

**Figure S3:**  $^{19}\text{F}$  NMR spectrum of 1,3-bis(3,5-bis(trifluoromethyl)phenyl)-3-hydroxyprop-2-en-1-one.

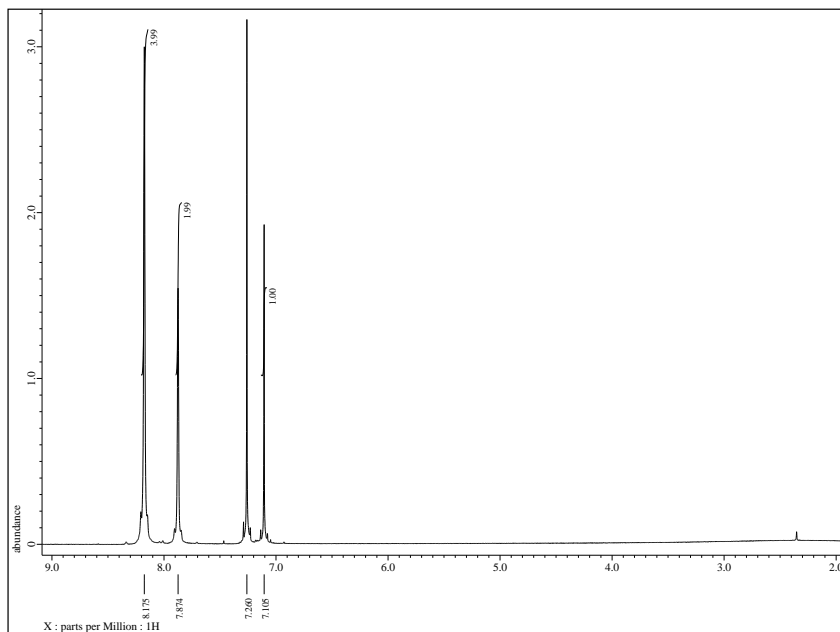

**Figure S4:**  $^1\text{H}$  NMR spectrum of 3,5-(3,5-( $\text{CF}_3$ ) $_2\text{Ph}$ ) $_2\text{PzH}$ .

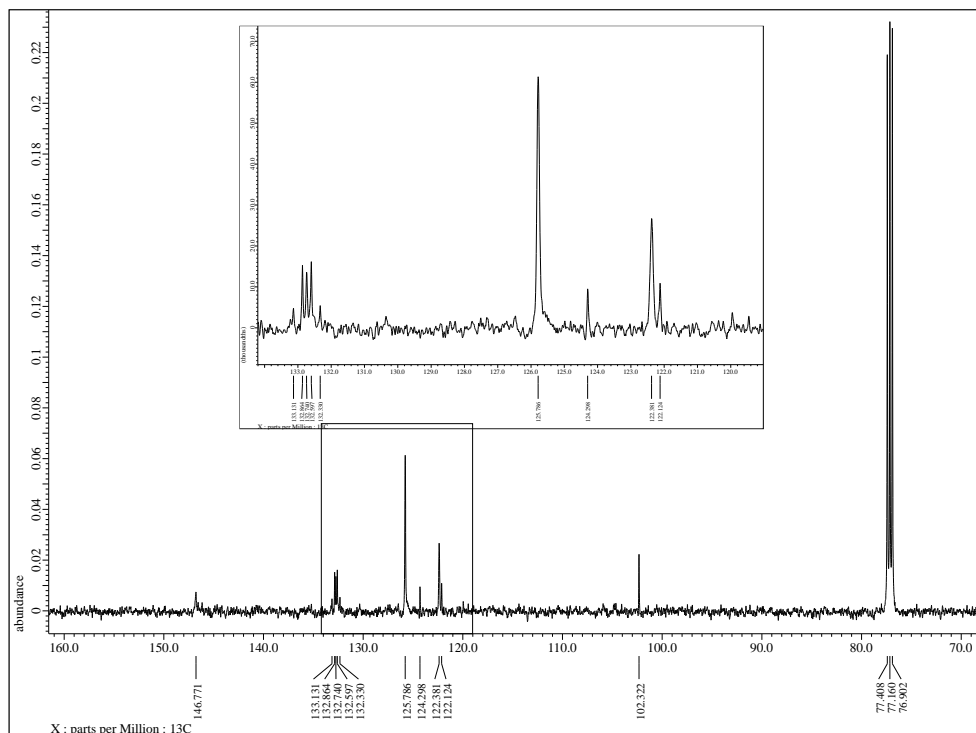

**Figure S5:**  $^{13}\text{C}\{^1\text{H}\}$  NMR spectrum of 3,5-(3,5-( $\text{CF}_3$ ) $_2\text{Ph}$ ) $_2\text{PzH}$ .

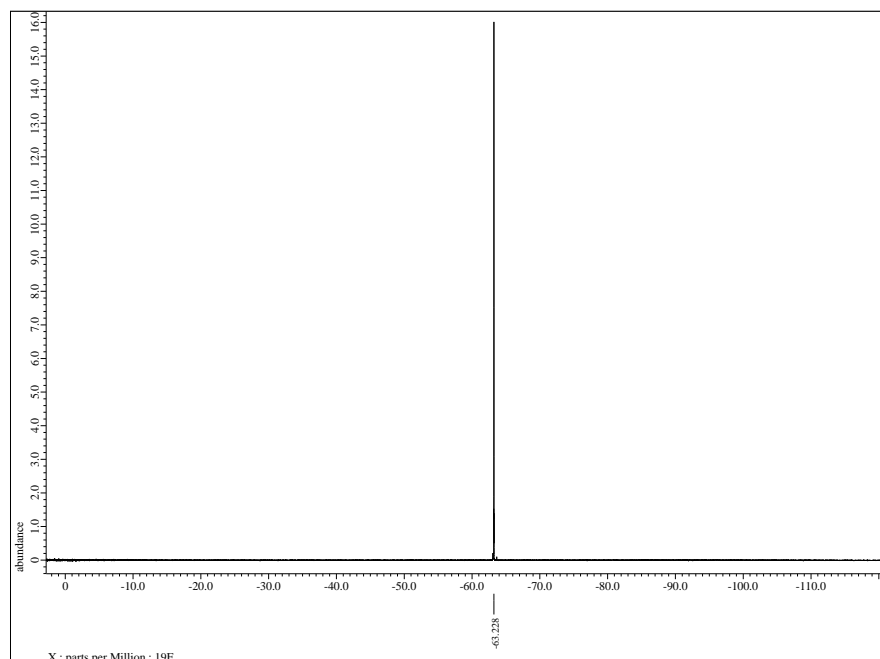

**Figure S6:**  $^{19}\text{F}$  NMR spectrum of 3,5-(3,5-( $\text{CF}_3$ ) $_2\text{Ph}$ ) $_2\text{PzH}$ .

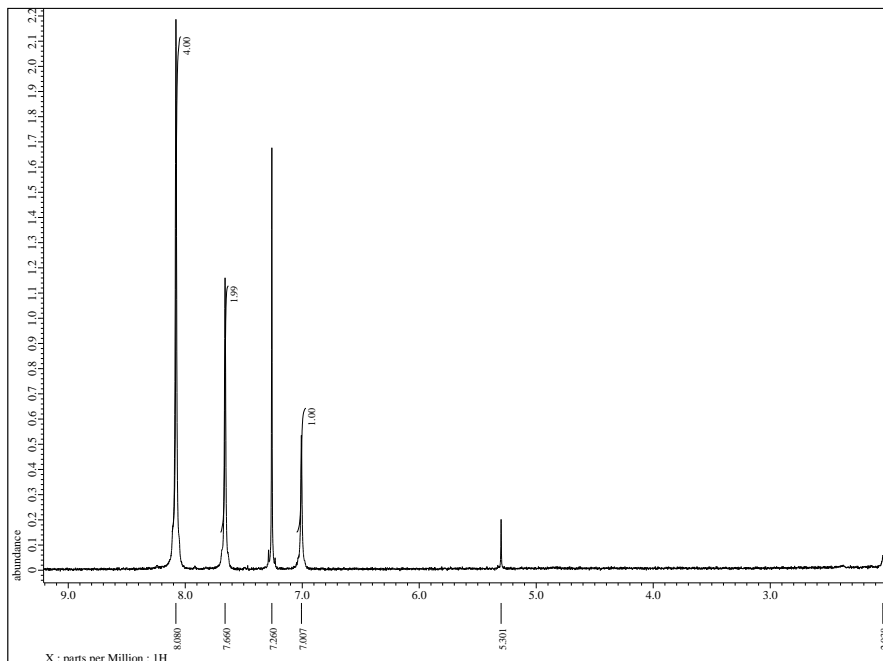

**Figure S7:**  $^1\text{H}$  NMR spectrum of  $\{[3,5-(3,5-(\text{CF}_3)_2\text{Ph})_2\text{Pz}]\text{Cu}\}_3$ .

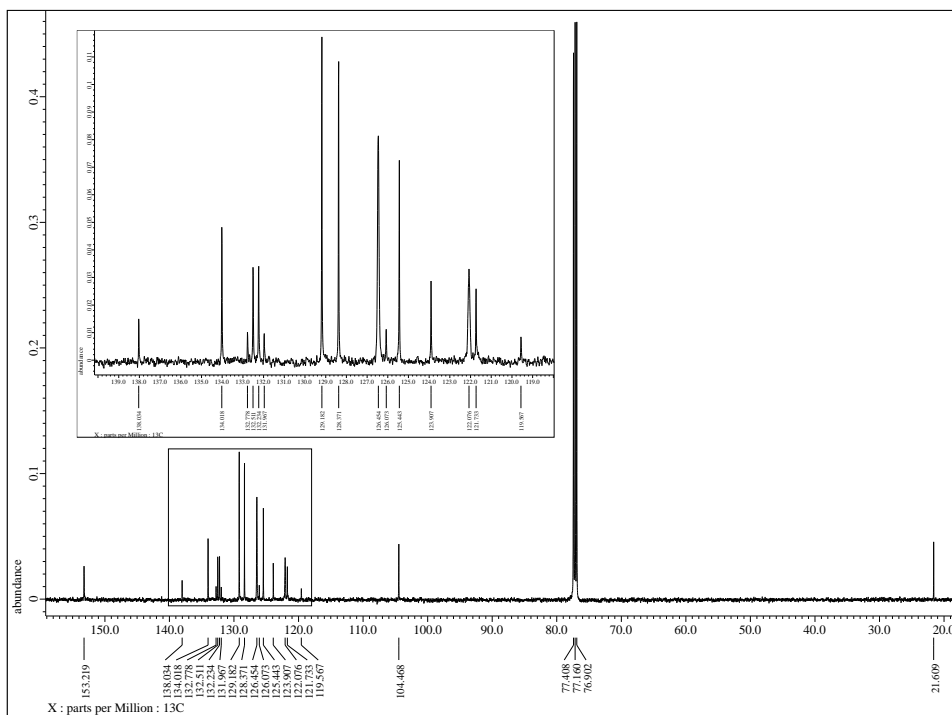

**Figure S8:**  $^{13}\text{C}\{^1\text{H}\}$  NMR spectrum of  $\{[3,5-(3,5-(\text{CF}_3)_2\text{Ph})_2\text{Pz}]\text{Cu}\}_3$ . Data collected on a sample containing some toluene as toluene free materials is not very soluble in  $\text{CDCl}_3$ .

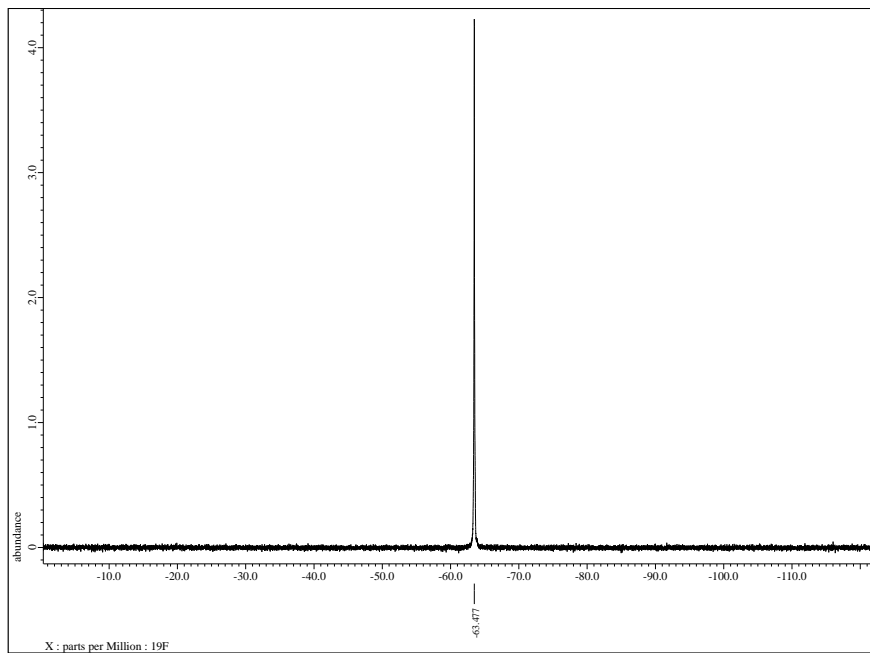

**Figure S9:**  $^{19}\text{F}$  NMR spectrum of  $\{[3,5-(3,5-(\text{CF}_3)_2\text{Ph})_2\text{Pz}]\text{Cu}\}_3$ .

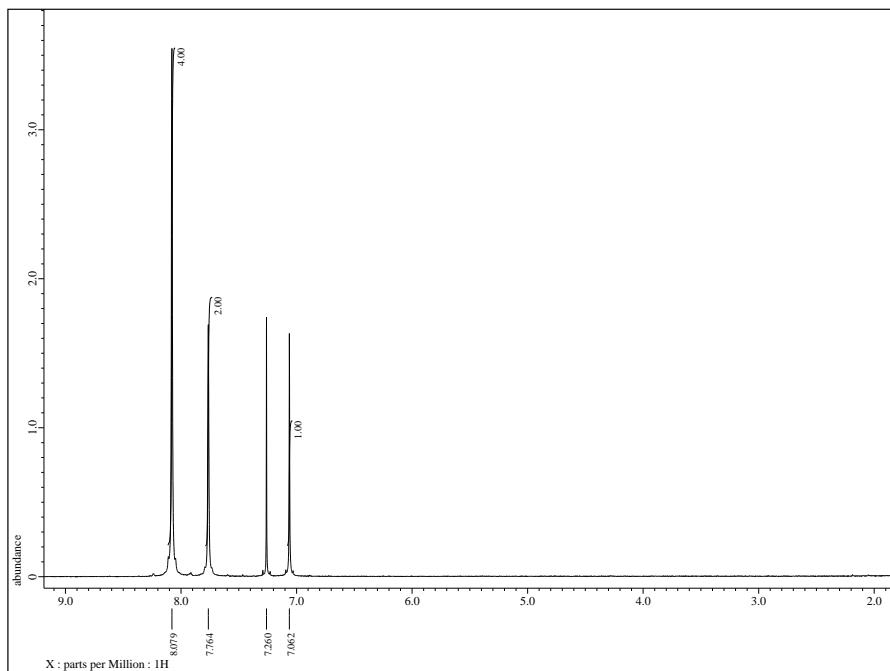

**Figure S10:**  $^1\text{H}$  NMR spectrum of  $\{[3,5-(3,5-(\text{CF}_3)_2\text{Ph})_2\text{Pz}]\text{Ag}\}_3$ .

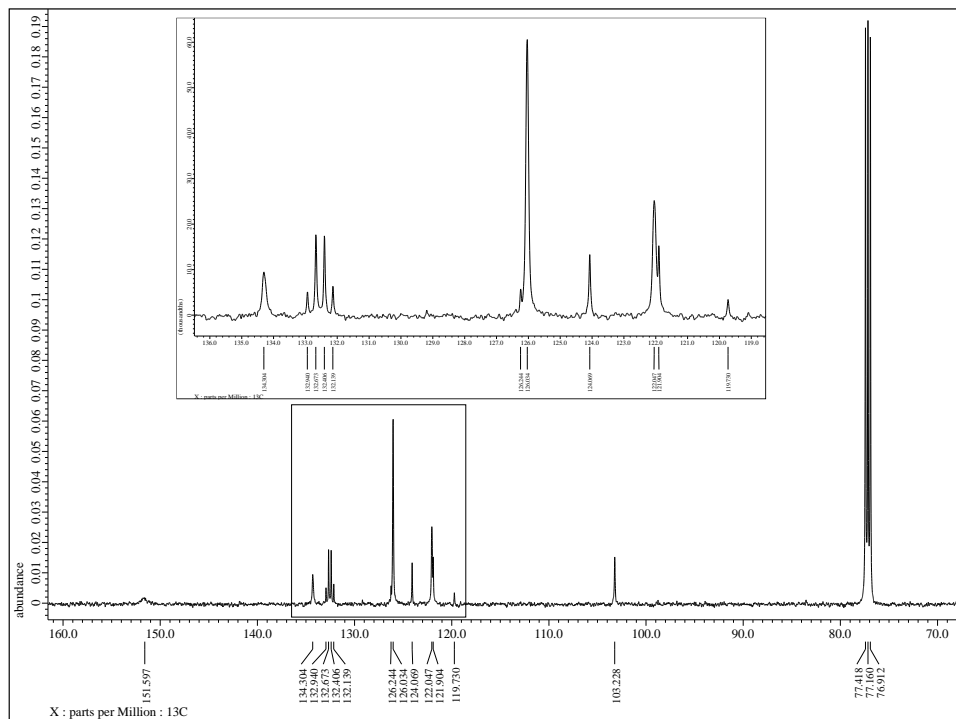

**Figure S11:**  $^{13}\text{C}\{^1\text{H}\}$  NMR spectrum of  $\{[3,5-(3,5-(\text{CF}_3)_2\text{Ph})_2\text{Pz}]\text{Ag}\}_3$ .

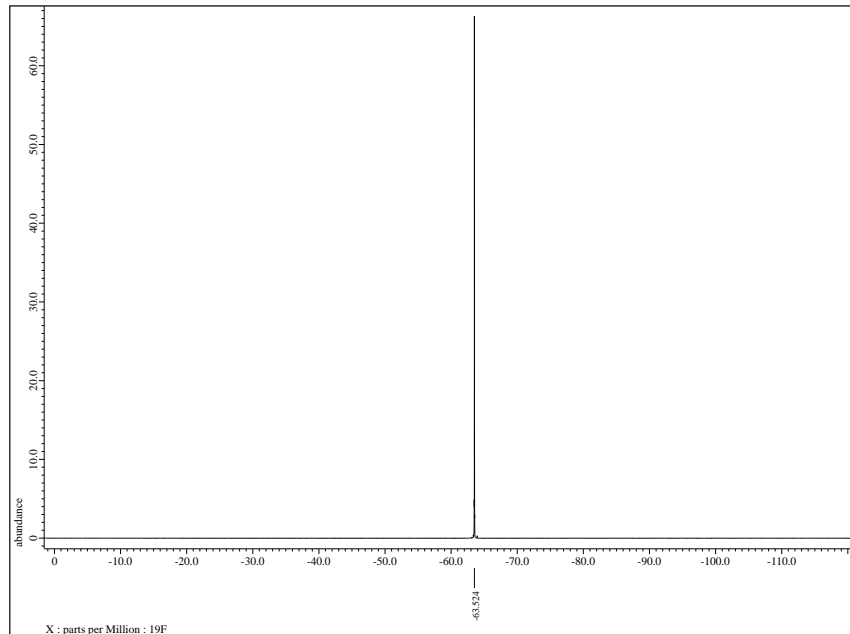

**Figure S12:**  $^{19}\text{F}$  NMR spectrum of  $\{[3,5-(3,5-(\text{CF}_3)_2\text{Ph})_2\text{Pz}]\text{Ag}\}_3$ .

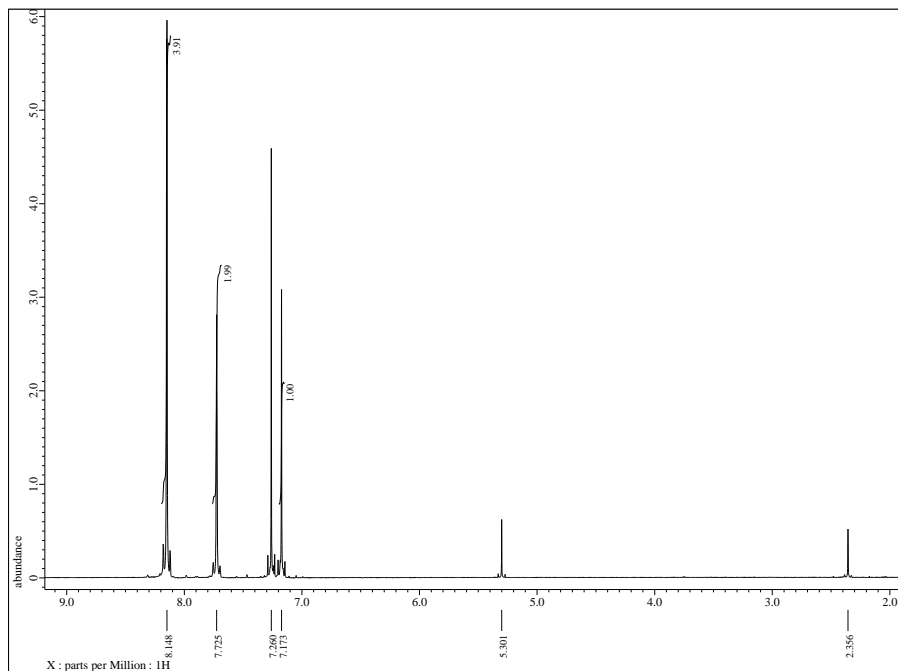

**Figure S13:**  $^1\text{H}$  NMR spectrum of  $\{[3,5-(3,5-(\text{CF}_3)_2\text{Ph})_2\text{Pz}]\text{Au}\}_3$ .

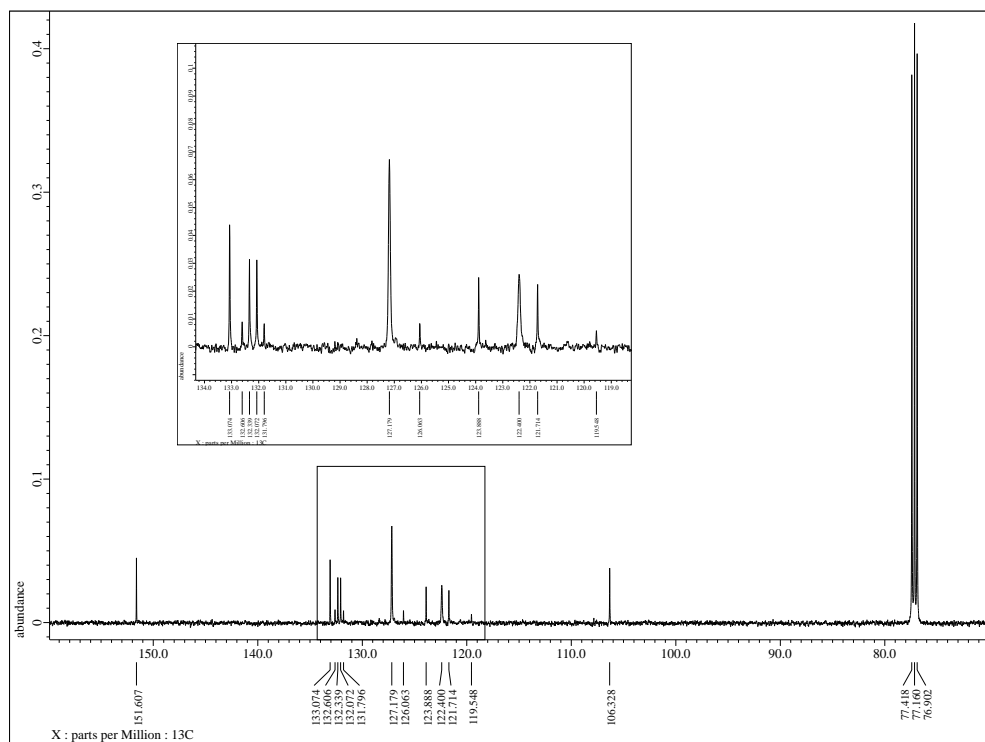

**Figure S14:**  $^{13}\text{C}\{^1\text{H}\}$  NMR spectrum of  $\{[3,5-(3,5-(\text{CF}_3)_2\text{Ph})_2\text{Pz}]\text{Au}\}_3$ .



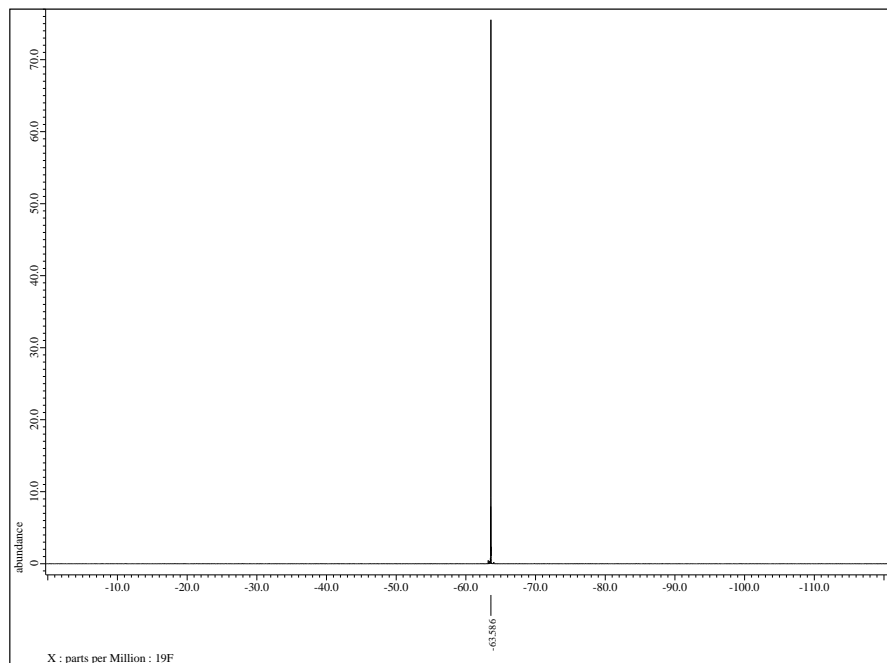

**Figure S15:**  $^{19}\text{F}$  NMR spectrum of  $\{[3,5-(3,5-(\text{CF}_3)_2\text{Ph})_2\text{Pz}]\text{Au}\}_3$ .

**Luminescence Data:**

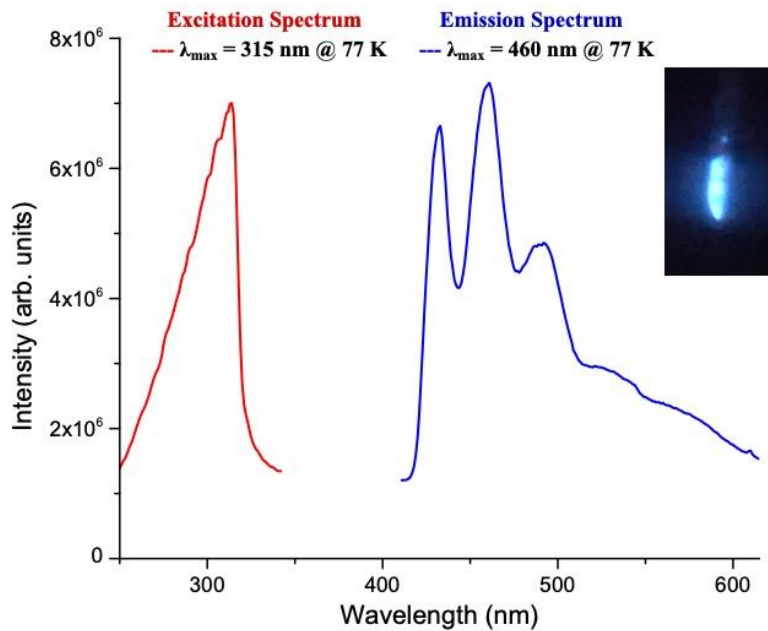

**Figure S16:** Luminescence Spectra of  $\{[3,5-(3,5-(CF_3)_2Ph)_2Pz]Cu\}_3$  at 77 K.

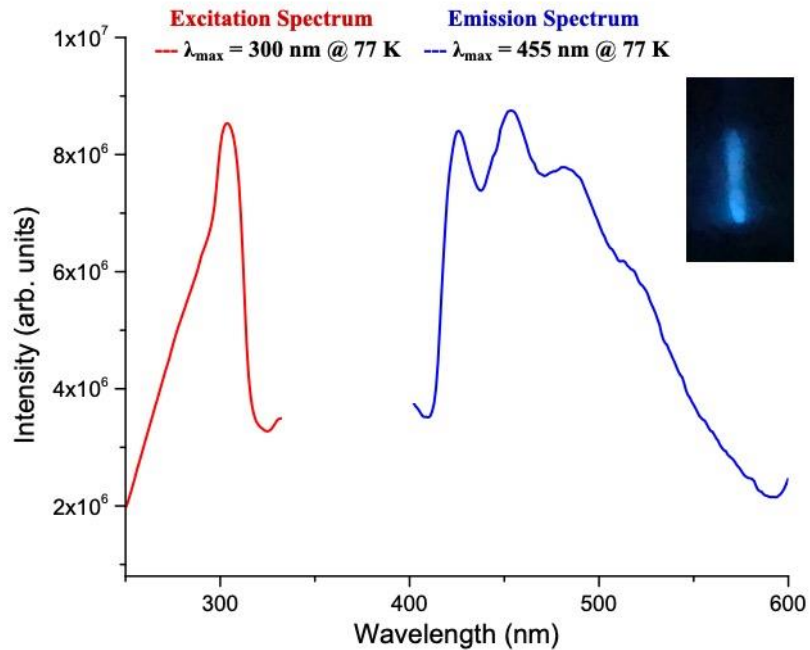

**Figure S17:** Luminescence Spectra of  $\{[3,5-(3,5-(CF_3)_2Ph)_2Pz]Ag\}_3$  at 77 K.

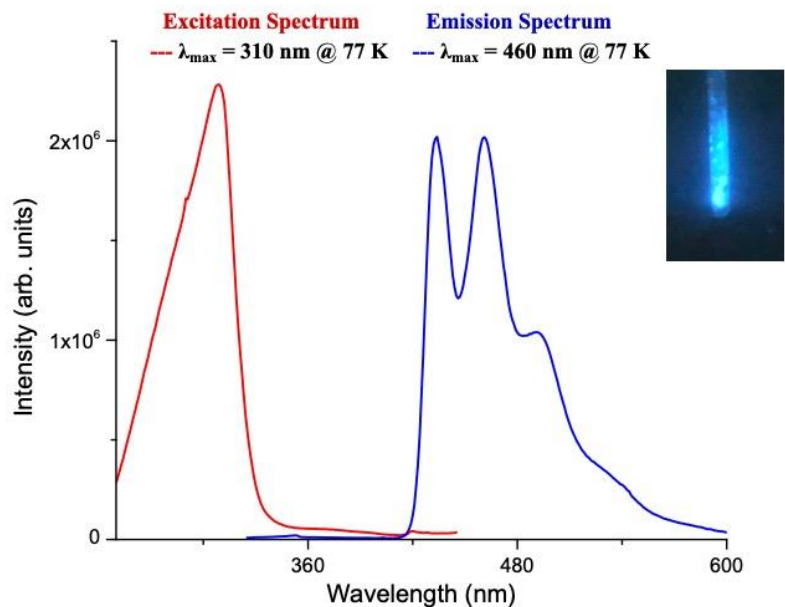

**Figure S18:** Luminescence Spectra of  $\{[3,5-(3,5-(CF_3)_2Ph)_2Pz]Au\}_3$  at 77 K.

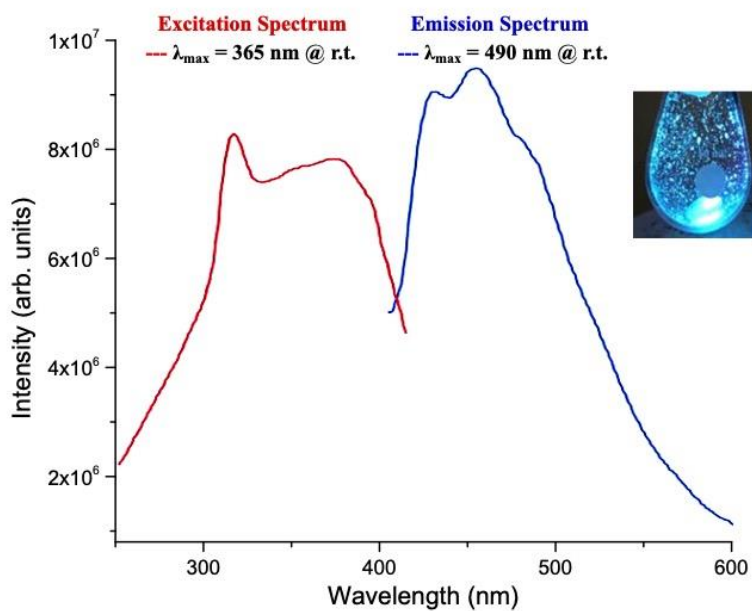

**Figure S19:** Luminescence Spectra of  $\{[3,5-(3,5-(CF_3)_2Ph)_2Pz]Au\}_3$  at room temperature.

**Table S1.** Azide-alkyne cycloaddition results

| Entry | Catalyst                                                                        | Alkyne          | Percent Conversion | Isolated Yield |
|-------|---------------------------------------------------------------------------------|-----------------|--------------------|----------------|
| 1     | {[3,5-(3,5-(CF <sub>3</sub> ) <sub>2</sub> Ph) <sub>2</sub> Pz]Cu} <sub>3</sub> | 1-Octyne        | 99 %               | 94 %           |
| 2     | {[3,5-(3,5-(CF <sub>3</sub> ) <sub>2</sub> Ph) <sub>2</sub> Pz]Ag} <sub>3</sub> | 1-Octyne        | 0 %                | N/A            |
| 3     | {[3,5-(3,5-(CF <sub>3</sub> ) <sub>2</sub> Ph) <sub>2</sub> Pz]Au} <sub>3</sub> | 1-Octyne        | 0 %                | N/A            |
| 4     | {[3,5-(3,5-(CF <sub>3</sub> ) <sub>2</sub> Ph) <sub>2</sub> Pz]Cu} <sub>3</sub> | Phenylacetylene | 100 %              | 97 %           |

**1-(p-tolyl)-4-hexyl-1H-1,2,3-triazole**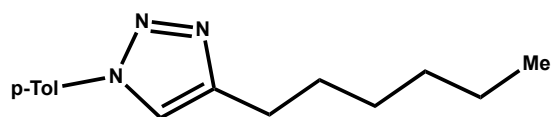

<sup>1</sup>H NMR (CDCl<sub>3</sub>, 500 MHz): 7.67 (s, 1H), 7.55 (d, 2H, J = 6.87 Hz), 7.23 (d, 2H, J = 6.87 Hz), 2.73 (t, 2H, J = 7.45 Hz), 2.35 (s, 3H), 1.65-1.71 (m, 2H), 1.33-1.37 (m, 2H), 1.26-1.29 (m, 4H), 0.85 (t, 3H, J = 6.87 Hz). <sup>13</sup>C{<sup>1</sup>H} NMR (CDCl<sub>3</sub>, 500 MHz): 149.0, 138.4, 135.0, 130.1, 120.2, 118.8, 31.6, 29.4, 29.0, 25.7, 22.6, 21.0, 14.1.

**Reference:** Devaborniny, P.; Ponduru, T.; Noonikara-Poyil, A.; Jayaranta, N.; Dias, H.V.R.; Acetylene and terminal alkyne complexes of copper(I) supported fluorinated pyrazolates: synthesis, structures, and transformations. *Dalton Transactions*. **2019**, 48, 15782-15794.

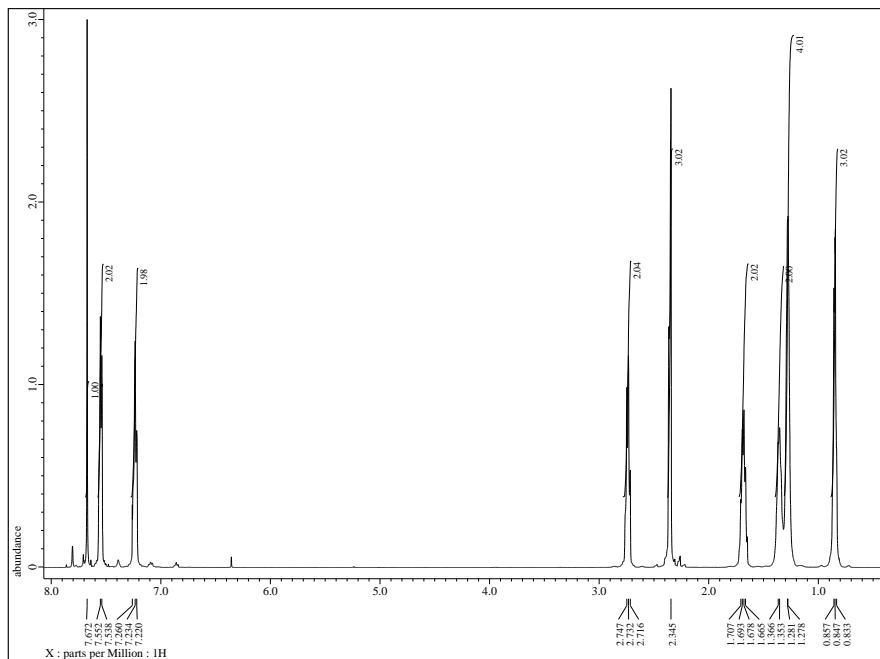

**Figure S20:**  $^1\text{H}$  NMR spectrum of 1-(*p*-tolyl)-4-hexyl-1*H*-1,2,3-triazole in  $\text{CDCl}_3$  at room temperature.

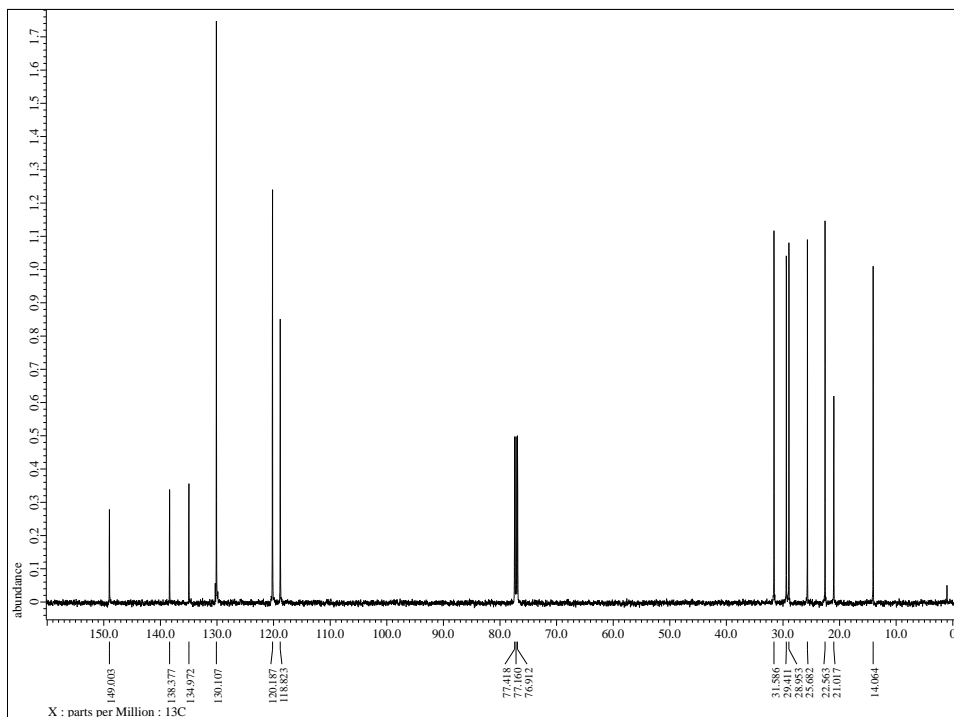

**Figure S21:**  $^{13}\text{C}\{^1\text{H}\}$  NMR spectrum of 1-(*p*-tolyl)-4-hexyl-1*H*-1,2,3-triazole in  $\text{CDCl}_3$  at room temperature.

## 1-(*p*-tolyl)-4-phenyl-1*H*-1,2,3-triazole

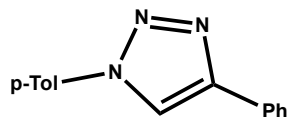

$^1\text{H}$  NMR ( $\text{CDCl}_3$ , 500 MHz): 8.15 (s, 1H), 7.90 (d, 2H,  $J = 7.45$  Hz), 7.65 (d, 2H,  $J = 8.60$  Hz), 7.45 (t, 2H,  $J = 7.45$  Hz), 7.30-7.36 (m, 3H), 2.42 (s, 3H).  $^{13}\text{C}\{^1\text{H}\}$  NMR ( $\text{CDCl}_3$ , 500 MHz): 148.3, 139.0, 134.8, 130.4, 129.0, 128.4, 125.9, 120.5, 117.8, 21.2.

**Reference:** Meng, X.; Xu, X.; Gao, T.; Chen, B.; *Eur. J. Org. Chem.* **2010**, 2010, 5409-5414.

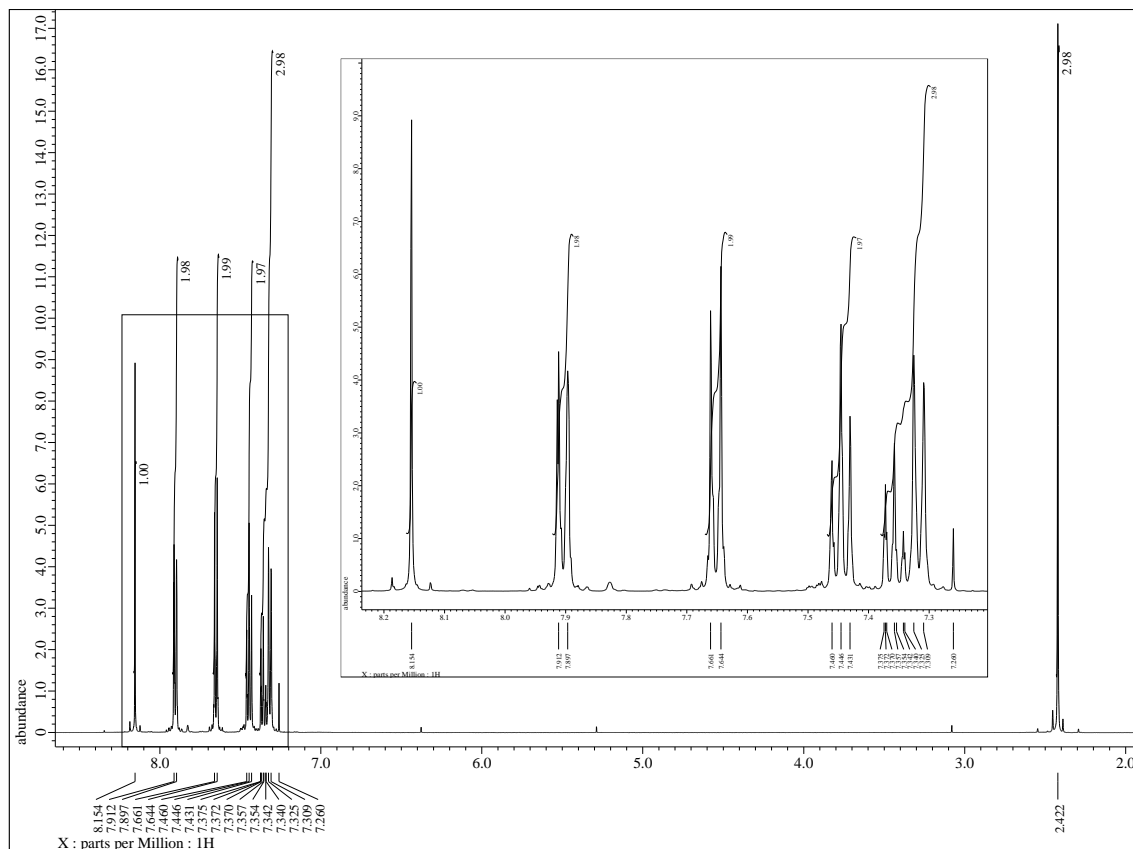

**Figure S22:**  $^1\text{H}$  NMR spectrum of 1-(*p*-tolyl)-4-phenyl-1*H*-1,2,3-triazole in  $\text{CDCl}_3$  at room temperature.

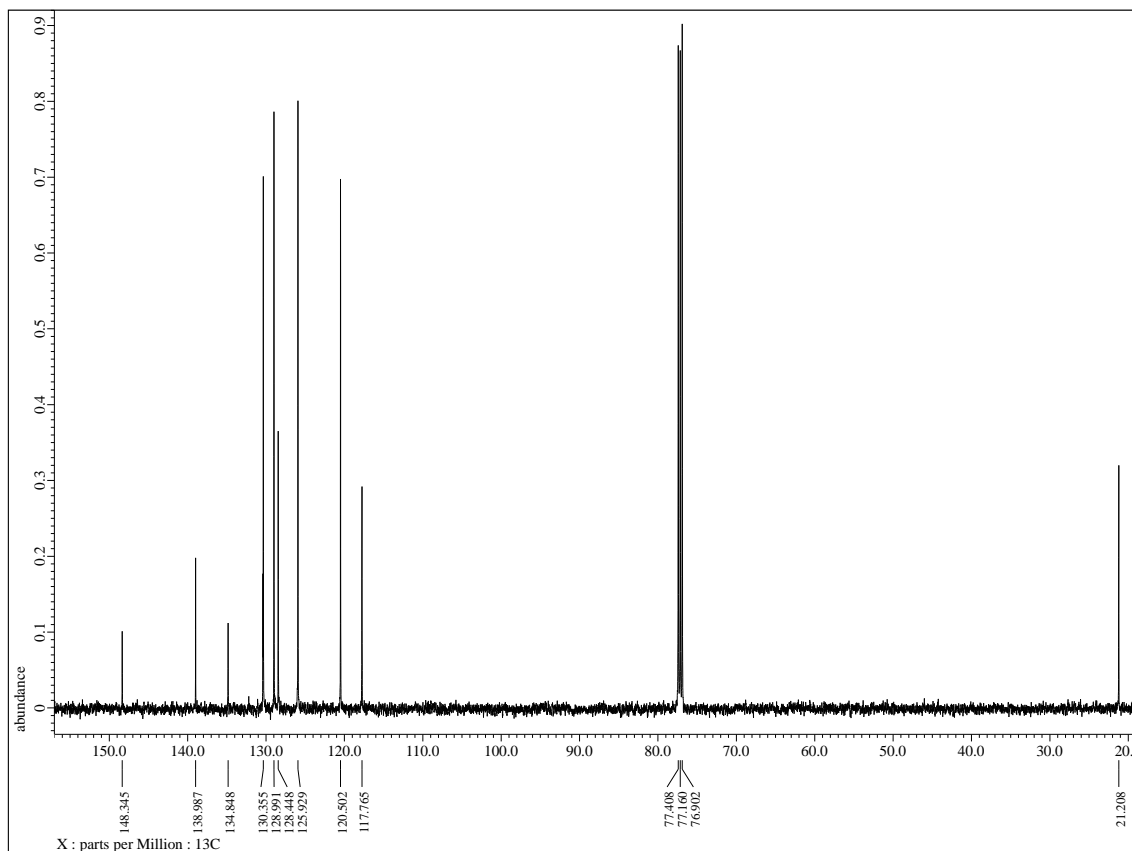

**Figure S23:**  $^{13}\text{C}\{^1\text{H}\}$  NMR spectrum of 1-(*p*-tolyl)-4-phenyl-1*H*-1,2,3-triazole in  $\text{CDCl}_3$  at room temperature.

**Table S2.** Copper catalyzed cyclopropanation reactions

| Entry | Catalyst                                                                        | EDA addition time (hours) | <i>trans:cis</i> * | Cyclopropane yield %* |
|-------|---------------------------------------------------------------------------------|---------------------------|--------------------|-----------------------|
| 1     | {[3,5-(3,5-(CF <sub>3</sub> ) <sub>2</sub> Ph) <sub>2</sub> Pz]Cu} <sub>3</sub> | 10                        | 73:27              | 45                    |
| 2     | {[3,5-(CF <sub>3</sub> ) <sub>2</sub> Pz]Cu} <sub>3</sub>                       | 10                        | 61:39              | 37                    |

\*Calculated from <sup>1</sup>H NMR, using an internal standard of dimethylformamide.

**Ethyl-2-phenylcyclopropane-1-carboxylate:**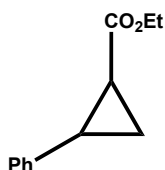

*cis*: <sup>1</sup>H NMR (CDCl<sub>3</sub>, 500 MHz): 7.29-7.19 (m, 5H), 3.89 (q, 2H, J = 7.0 Hz), 2.60 (app q, 1H, J = 8.5 Hz), 2.10 (ddd, 1H, J = 9.3, 8.6, 5.0 Hz), 1.73 (ddd, 1H, J = 6.5, 5.0, 4.6 Hz), 1.35 (ddd, 1H, J = 8.6, 8.3, 4.6 Hz), 0.99 (t, 3H, J = 7.0 Hz). <sup>13</sup>C NMR (CDCl<sub>3</sub>, 500 MHz): 171.0, 136.6, 129.3, 127.9, 126.6, 60.1, 25.4, 21.8, 14.0, 11.1.

*trans*: <sup>1</sup>H NMR (CDCl<sub>3</sub>, 500 MHz): 7.33-7.11 (m, 5H), 4.19 (q, 2H, J = 7.0 Hz), 2.54 (ddd, 1H, J = 9.2, 6.5, 4.0 Hz), 1.92 (ddd, 1H, J = 8.2, 5.3, 4.0 Hz), 1.62 (ddd, 1H, J = 9.2, 5.3, 4.6 Hz), 1.33 (ddd, 1H, J = 8.2, 6.6, 4.6 Hz), 1.30 (t, 3H, J = 7.0 Hz). <sup>13</sup>C NMR (CDCl<sub>3</sub>, 500 MHz): 173.4, 140.1, 128.5, 126.5, 126.2, 60.7, 26.2, 24.2, 17.1, 14.3.

**Reference:** Barrett, A.; Braddock, D.; Lenoir, I.; Tone, H.; *J. Org. Chem.* **2001**, *66*, 8260-8263.



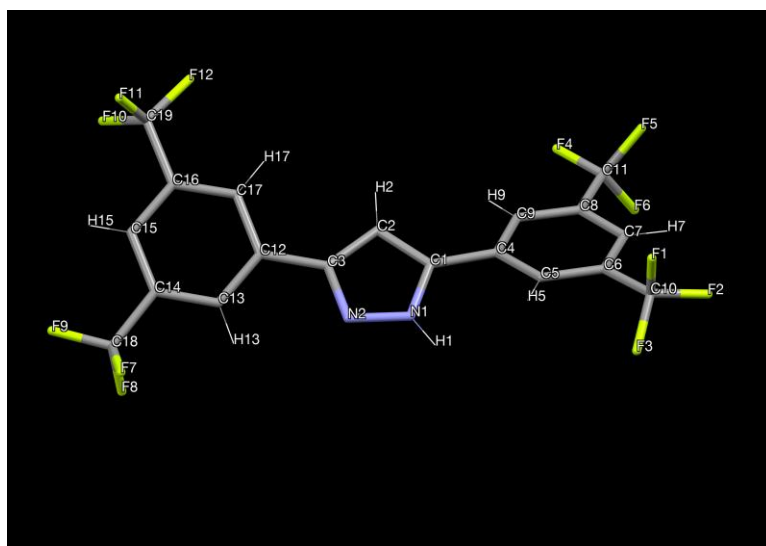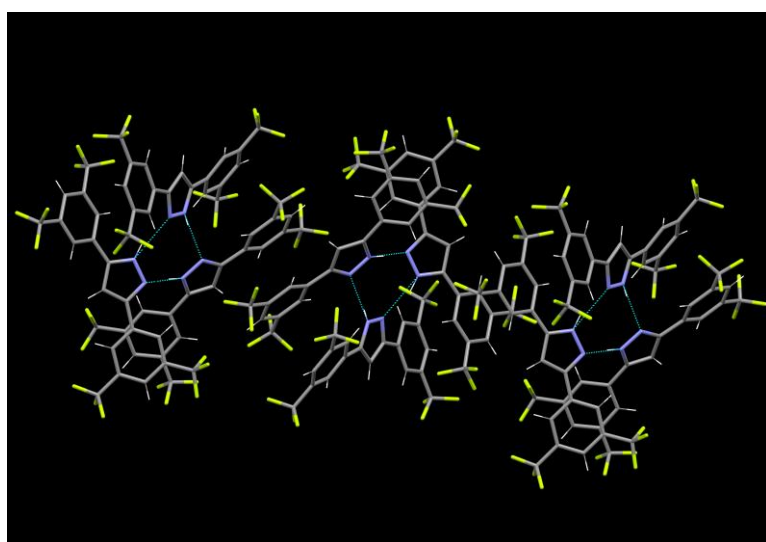

**Figure S24.** Top: Molecular structure and atom labelling scheme of 3,5-(3,5-(CF<sub>3</sub>)<sub>2</sub>Ph)<sub>2</sub>PzH. Bottom: A view showing packing of hydrogen bonded 3,5-(3,5-(CF<sub>3</sub>)<sub>2</sub>Ph)<sub>2</sub>PzH trimers

**Table S3. Crystal data and structure refinement for 3,5-(3,5-(CF<sub>3</sub>)<sub>2</sub>Ph)<sub>2</sub>PzH.**

|                     |                                                               |
|---------------------|---------------------------------------------------------------|
| Identification code | Rad534                                                        |
| Empirical formula   | C <sub>19</sub> H <sub>8</sub> F <sub>12</sub> N <sub>2</sub> |
| Formula weight      | 492.27                                                        |
| Temperature/K       | 99.99                                                         |
| Crystal system      | trigonal                                                      |
| Space group         | R-3                                                           |
| a/Å                 | 17.7048(6)                                                    |

|                                             |                                                                |
|---------------------------------------------|----------------------------------------------------------------|
| b/Å                                         | 17.7048(6)                                                     |
| c/Å                                         | 31.8231(11)                                                    |
| $\alpha$ /°                                 | 90                                                             |
| $\beta$ /°                                  | 90                                                             |
| $\gamma$ /°                                 | 120                                                            |
| Volume/Å <sup>3</sup>                       | 8638.8(7)                                                      |
| Z                                           | 18                                                             |
| $\rho_{\text{calc}}$ /cm <sup>3</sup>       | 1.703                                                          |
| $\mu$ /mm <sup>-1</sup>                     | 0.184                                                          |
| F(000)                                      | 4392.0                                                         |
| Crystal size/mm <sup>3</sup>                | 0.5 × 0.41 × 0.25                                              |
| Radiation                                   | MoK $\alpha$ ( $\lambda$ = 0.71073)                            |
| 2 $\Theta$ range for data collection/°      | 5.466 to 59.264                                                |
| Index ranges                                | -24 ≤ h ≤ 24, -24 ≤ k ≤ 24, -44 ≤ l ≤ 44                       |
| Reflections collected                       | 36951                                                          |
| Independent reflections                     | 5428 [ $R_{\text{int}}$ = 0.0228, $R_{\text{sigma}}$ = 0.0144] |
| Data/restraints/parameters                  | 5428/0/300                                                     |
| Goodness-of-fit on F <sup>2</sup>           | 1.041                                                          |
| Final R indexes [ $I \geq 2\sigma(I)$ ]     | $R_1$ = 0.0332, $wR_2$ = 0.0889                                |
| Final R indexes [all data]                  | $R_1$ = 0.0342, $wR_2$ = 0.0900                                |
| Largest diff. peak/hole / e Å <sup>-3</sup> | 0.35/-0.41                                                     |

**Table S4. Bond Lengths for 3,5-(3,5-(CF<sub>3</sub>)<sub>2</sub>Ph)<sub>2</sub>PzH.**

| Atom | Atom | Length/Å    | Atom | Atom | Length/Å    |
|------|------|-------------|------|------|-------------|
| F1   | C10  | 1.3346 (17) | C3   | C12  | 1.4691 (16) |
| F2   | C10  | 1.3187 (17) | C4   | C5   | 1.3944 (16) |
| F3   | C10  | 1.3388 (16) | C4   | C9   | 1.4013 (16) |
| F4   | C11  | 1.3247 (17) | C5   | C6   | 1.3907 (17) |
| F5   | C11  | 1.3371 (18) | C6   | C7   | 1.3871 (17) |
| F6   | C11  | 1.3237 (19) | C6   | C10  | 1.5001 (17) |
| F7   | C18  | 1.3388 (16) | C7   | C8   | 1.3939 (17) |
| F8   | C18  | 1.3420 (17) | C8   | C9   | 1.3834 (17) |
| F9   | C18  | 1.3321 (16) | C8   | C11  | 1.5007 (18) |
| F10  | C19  | 1.3301 (18) | C12  | C13  | 1.3977 (16) |
| F11  | C19  | 1.3356 (18) | C12  | C17  | 1.4001 (16) |
| F12  | C19  | 1.3238 (18) | C13  | C14  | 1.3888 (17) |
| N1   | N2   | 1.3478 (14) | C14  | C15  | 1.3885 (18) |
| N1   | C1   | 1.3563 (15) | C14  | C18  | 1.5039 (18) |
| N2   | C3   | 1.3434 (15) | C15  | C16  | 1.3953 (18) |
| C1   | C2   | 1.3905 (16) | C16  | C17  | 1.3862 (17) |
| C1   | C4   | 1.4656 (16) | C16  | C19  | 1.5074 (18) |

C2 C3 1.4071 (16)

**Table S5. Bond Angles for 3,5-(3,5-(CF<sub>3</sub>)<sub>2</sub>Ph)<sub>2</sub>PzH.**

| Atom | Atom | Atom | Angle/°     | Atom | Atom | Atom | Angle/°     |
|------|------|------|-------------|------|------|------|-------------|
| N2   | N1   | C1   | 112.37 (10) | F5   | C11  | C8   | 111.59 (12) |
| C3   | N2   | N1   | 105.30 (10) | F6   | C11  | F4   | 106.99 (13) |
| N1   | C1   | C2   | 106.48 (10) | F6   | C11  | F5   | 105.72 (13) |
| N1   | C1   | C4   | 121.14 (11) | F6   | C11  | C8   | 111.80 (12) |
| C2   | C1   | C4   | 132.38 (11) | C13  | C12  | C3   | 119.70 (11) |
| C1   | C2   | C3   | 104.97 (9)  | C13  | C12  | C17  | 118.99 (11) |
| N2   | C3   | C2   | 110.88 (10) | C17  | C12  | C3   | 121.31 (11) |
| N2   | C3   | C12  | 118.78 (10) | C14  | C13  | C12  | 120.17 (11) |
| C2   | C3   | C12  | 130.34 (11) | C13  | C14  | C18  | 118.24 (11) |
| C5   | C4   | C1   | 120.33 (11) | C15  | C14  | C13  | 121.22 (11) |
| C5   | C4   | C9   | 119.19 (11) | C15  | C14  | C18  | 120.52 (11) |
| C9   | C4   | C1   | 120.46 (10) | C14  | C15  | C16  | 118.29 (11) |
| C6   | C5   | C4   | 120.14 (11) | C15  | C16  | C19  | 117.74 (11) |
| C5   | C6   | C10  | 119.20 (11) | C17  | C16  | C15  | 121.34 (11) |
| C7   | C6   | C5   | 120.99 (11) | C17  | C16  | C19  | 120.91 (12) |
| C7   | C6   | C10  | 119.74 (11) | C16  | C17  | C12  | 119.95 (11) |
| C6   | C7   | C8   | 118.48 (11) | F7   | C18  | F8   | 105.64 (12) |
| C7   | C8   | C11  | 117.90 (11) | F7   | C18  | C14  | 111.95 (10) |
| C9   | C8   | C7   | 121.40 (11) | F8   | C18  | C14  | 111.27 (12) |
| C9   | C8   | C11  | 120.68 (11) | F9   | C18  | F7   | 108.07 (12) |
| C8   | C9   | C4   | 119.75 (11) | F9   | C18  | F8   | 106.46 (11) |
| F1   | C10  | F3   | 105.30 (11) | F9   | C18  | C14  | 113.01 (11) |
| F1   | C10  | C6   | 111.26 (12) | F10  | C19  | F11  | 106.25 (13) |
| F2   | C10  | F1   | 106.72 (13) | F10  | C19  | C16  | 111.43 (12) |
| F2   | C10  | F3   | 107.88 (14) | F11  | C19  | C16  | 111.19 (12) |
| F2   | C10  | C6   | 112.96 (12) | F12  | C19  | F10  | 108.45 (13) |
| F3   | C10  | C6   | 112.27 (11) | F12  | C19  | F11  | 106.50 (13) |
| F4   | C11  | F5   | 107.36 (14) | F12  | C19  | C16  | 112.69 (12) |
| F4   | C11  | C8   | 112.97 (11) |      |      |      |             |

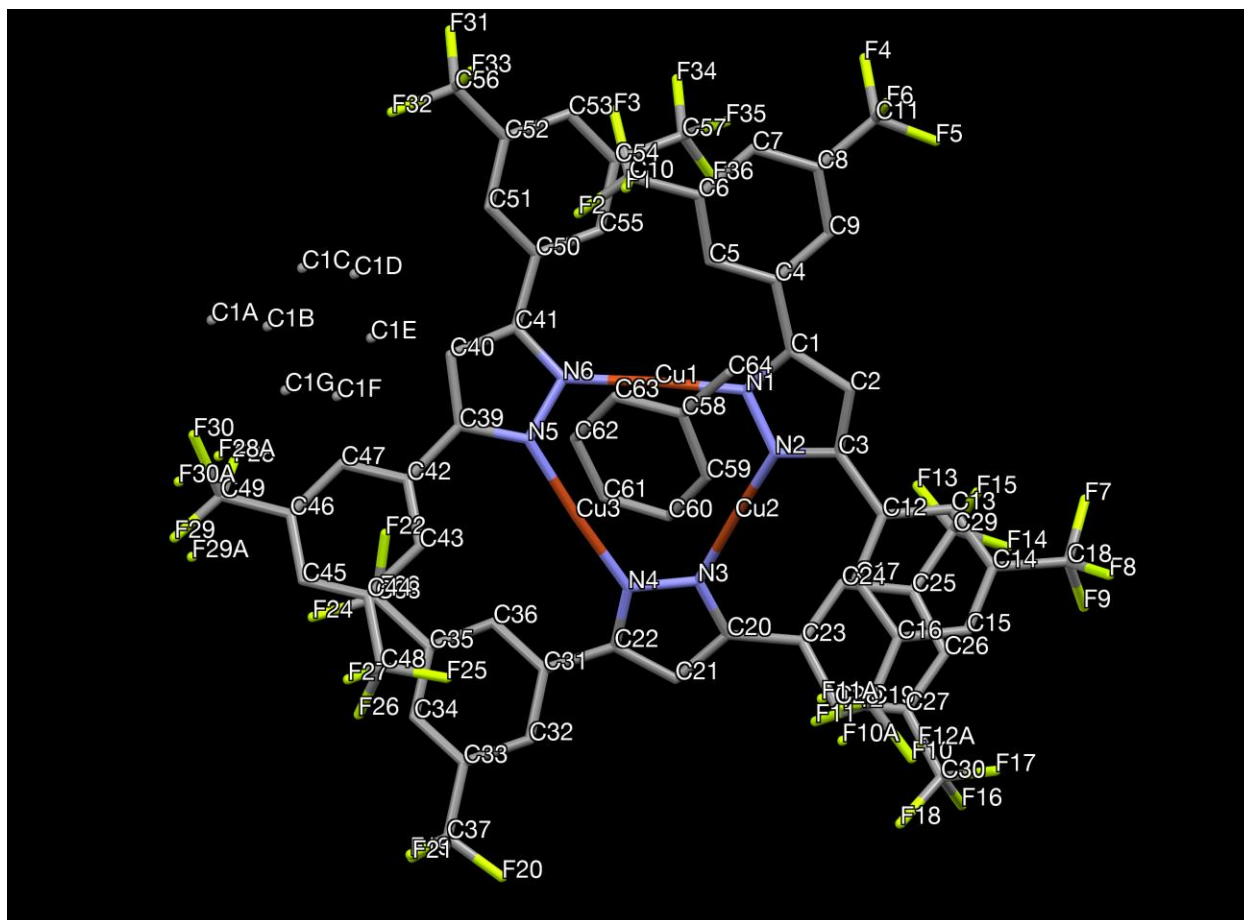

**Figure S25.** Molecular structure and atom labelling scheme of {[3,5-(3,5-(CF<sub>3</sub>)<sub>2</sub>Ph)<sub>2</sub>Pz]Cu}<sub>3</sub>·1.5(toluene)

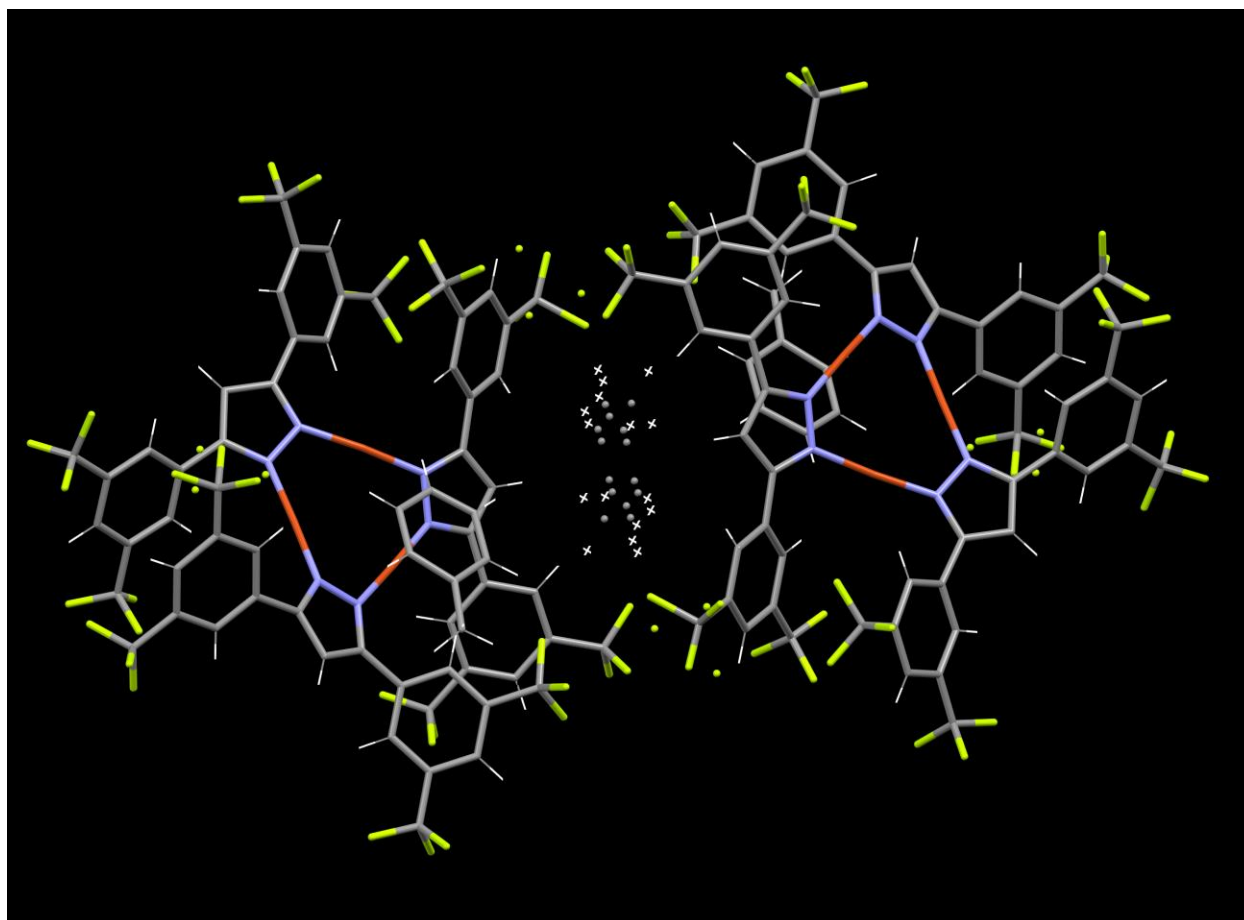

**Figure S26.** A view of packing two moieties of {[3,5-(3,5-(CF<sub>3</sub>)<sub>2</sub>Ph)<sub>2</sub>Pz]Cu}<sub>3</sub>•1.5(toluene)

**Table S6. Crystal data and structure refinement for {[3,5-(3,5-(CF<sub>3</sub>)<sub>2</sub>Ph)<sub>2</sub>Pz]Cu}<sub>3</sub>•1.5(toluene).**

|                       |                                                                                  |
|-----------------------|----------------------------------------------------------------------------------|
| Identification code   | Rad539                                                                           |
| Empirical formula     | C <sub>67.5</sub> H <sub>33</sub> Cu <sub>3</sub> F <sub>36</sub> N <sub>6</sub> |
| Formula weight        | 1802.62                                                                          |
| Temperature/K         | 100.01                                                                           |
| Crystal system        | triclinic                                                                        |
| Space group           | P-1                                                                              |
| a/Å                   | 8.4054(10)                                                                       |
| b/Å                   | 19.555(2)                                                                        |
| c/Å                   | 21.674(2)                                                                        |
| α/°                   | 107.382(2)                                                                       |
| β/°                   | 91.600(2)                                                                        |
| γ/°                   | 98.226(2)                                                                        |
| Volume/Å <sup>3</sup> | 3355.4(7)                                                                        |

|                                                |                                                                |
|------------------------------------------------|----------------------------------------------------------------|
| Z                                              | 2                                                              |
| $\rho_{\text{calc}}/\text{cm}^3$               | 1.784                                                          |
| $\mu/\text{mm}^{-1}$                           | 1.091                                                          |
| F(000)                                         | 1782.0                                                         |
| Crystal size/ $\text{mm}^3$                    | $0.3 \times 0.07 \times 0.05$                                  |
| Radiation                                      | MoK $\alpha$ ( $\lambda = 0.71073$ )                           |
| 2 $\Theta$ range for data collection/ $^\circ$ | 5.654 to 52                                                    |
| Index ranges                                   | $-10 \leq h \leq 10, -24 \leq k \leq 24, -26 \leq l \leq 26$   |
| Reflections collected                          | 30015                                                          |
| Independent reflections                        | 13114 [ $R_{\text{int}} = 0.0440, R_{\text{sigma}} = 0.0620$ ] |
| Data/restraints/parameters                     | 13114/327/1104                                                 |
| Goodness-of-fit on $F^2$                       | 1.086                                                          |
| Final R indexes [ $I \geq 2\sigma(I)$ ]        | $R_1 = 0.0864, wR_2 = 0.2395$                                  |
| Final R indexes [all data]                     | $R_1 = 0.1105, wR_2 = 0.2592$                                  |
| Largest diff. peak/hole / $e \text{ \AA}^{-3}$ | 2.40/-0.97                                                     |

**Table S7. Bond Lengths for {[3,5-(3,5-(CF<sub>3</sub>)<sub>2</sub>Ph)<sub>2</sub>Pz]Cu}<sub>3</sub>•1.5(toluene).**

| Atom | Atom | Length/ $\text{\AA}$ | Atom | Atom | Length/ $\text{\AA}$ |
|------|------|----------------------|------|------|----------------------|
| Cu1  | N1   | 1.869 (7)            | C14  | C15  | 1.379 (14)           |
| Cu1  | N6   | 1.867 (7)            | C14  | C18  | 1.504 (13)           |
| Cu2  | N2   | 1.848 (7)            | C15  | C16  | 1.394 (13)           |
| Cu2  | N3   | 1.843 (7)            | C16  | C17  | 1.399 (12)           |
| Cu3  | N4   | 1.849 (7)            | C16  | C19  | 1.427 (10)           |
| Cu3  | N5   | 1.854 (7)            | C19  | F11A | 1.382 (12)           |
| F1   | C10  | 1.333 (12)           | C19  | F12A | 1.387 (11)           |
| F2   | C10  | 1.331 (11)           | C19  | F10A | 1.315 (12)           |
| F3   | C10  | 1.343 (12)           | C20  | C21  | 1.411 (11)           |
| F4   | C11  | 1.336 (11)           | C20  | C23  | 1.462 (11)           |
| F5   | C11  | 1.330 (11)           | C21  | C22  | 1.385 (11)           |
| F6   | C11  | 1.340 (11)           | C22  | C31  | 1.478 (11)           |
| F7   | C18  | 1.337 (12)           | C23  | C24  | 1.403 (12)           |
| F8   | C18  | 1.323 (14)           | C23  | C28  | 1.387 (12)           |
| F9   | C18  | 1.339 (13)           | C24  | C25  | 1.391 (12)           |
| F10  | C19  | 1.354 (11)           | C25  | C26  | 1.390 (14)           |
| F11  | C19  | 1.412 (12)           | C25  | C29  | 1.500 (13)           |
| F12  | C19  | 1.334 (12)           | C26  | C27  | 1.383 (13)           |
| F13  | C29  | 1.325 (13)           | C27  | C28  | 1.392 (12)           |
| F14  | C29  | 1.323 (12)           | C27  | C30  | 1.500 (13)           |
| F15  | C29  | 1.327 (13)           | C31  | C32  | 1.399 (11)           |
| F16  | C30  | 1.297 (16)           | C31  | C36  | 1.396 (12)           |
| F17  | C30  | 1.312 (15)           | C32  | C33  | 1.406 (11)           |

|     |     |            |     |      |            |
|-----|-----|------------|-----|------|------------|
| F18 | C30 | 1.330 (13) | C33 | C34  | 1.370 (13) |
| F19 | C37 | 1.304 (12) | C33 | C37  | 1.495 (12) |
| F20 | C37 | 1.308 (12) | C34 | C35  | 1.386 (12) |
| F21 | C37 | 1.318 (11) | C35 | C36  | 1.390 (11) |
| F22 | C38 | 1.340 (11) | C35 | C38  | 1.505 (12) |
| F23 | C38 | 1.339 (11) | C39 | C40  | 1.393 (12) |
| F24 | C38 | 1.331 (10) | C39 | C42  | 1.456 (11) |
| F25 | C48 | 1.305 (13) | C40 | C41  | 1.377 (11) |
| F26 | C48 | 1.343 (13) | C41 | C50  | 1.482 (11) |
| F27 | C48 | 1.323 (14) | C42 | C43  | 1.389 (12) |
| F28 | C49 | 1.39 (3)   | C42 | C47  | 1.402 (11) |
| F29 | C49 | 1.21 (2)   | C43 | C44  | 1.402 (11) |
| F30 | C49 | 1.49 (3)   | C44 | C45  | 1.378 (13) |
| F31 | C56 | 1.308 (13) | C44 | C48  | 1.491 (13) |
| F32 | C56 | 1.323 (12) | C45 | C46  | 1.391 (13) |
| F33 | C56 | 1.332 (13) | C46 | C47  | 1.393 (12) |
| F34 | C57 | 1.321 (11) | C46 | C49  | 1.490 (12) |
| F35 | C57 | 1.297 (12) | C49 | F29A | 1.440 (19) |
| F36 | C57 | 1.310 (12) | C49 | F28A | 1.26 (3)   |
| N1  | N2  | 1.363 (9)  | C49 | F30A | 1.235 (17) |
| N1  | C1  | 1.346 (10) | C50 | C51  | 1.398 (11) |
| N2  | C3  | 1.347 (10) | C50 | C55  | 1.396 (11) |
| N3  | N4  | 1.368 (9)  | C51 | C52  | 1.381 (12) |
| N3  | C20 | 1.335 (11) | C52 | C53  | 1.403 (13) |
| N4  | C22 | 1.346 (11) | C52 | C56  | 1.492 (13) |
| N5  | N6  | 1.373 (9)  | C53 | C54  | 1.376 (13) |
| N5  | C39 | 1.356 (10) | C54 | C55  | 1.396 (12) |
| N6  | C41 | 1.352 (10) | C54 | C57  | 1.489 (12) |
| C1  | C2  | 1.390 (11) | C58 | C59  | 1.429 (16) |
| C1  | C4  | 1.478 (10) | C58 | C63  | 1.379 (16) |
| C2  | C3  | 1.375 (11) | C58 | C64  | 1.463 (15) |
| C3  | C12 | 1.483 (11) | C59 | C60  | 1.344 (17) |
| C4  | C5  | 1.385 (11) | C60 | C61  | 1.363 (19) |
| C4  | C9  | 1.394 (11) | C61 | C62  | 1.352 (19) |
| C5  | C6  | 1.396 (12) | C62 | C63  | 1.453 (18) |
| C6  | C7  | 1.396 (13) | C1A | C1B  | 1.504 (19) |
| C6  | C10 | 1.488 (13) | C1B | C1C  | 1.394 (15) |
| C7  | C8  | 1.374 (12) | C1B | C1G  | 1.391 (15) |
| C8  | C9  | 1.395 (11) | C1C | C1D  | 1.389 (15) |
| C8  | C11 | 1.496 (12) | C1D | C1E  | 1.389 (15) |
| C12 | C13 | 1.386 (12) | C1E | C1F  | 1.391 (15) |

|     |     |            |     |     |            |
|-----|-----|------------|-----|-----|------------|
| C12 | C17 | 1.390 (12) | C1F | C1G | 1.386 (15) |
| C13 | C14 | 1.382 (13) |     |     |            |

**Table S8. Bond Angles for {[3,5-(3,5-(CF<sub>3</sub>)<sub>2</sub>Ph)<sub>2</sub>Pz]Cu}<sub>3</sub>•1.5(toluene).**

| Atom | Atom | Atom | Angle/°   | Atom | Atom | Atom | Angle/°    |
|------|------|------|-----------|------|------|------|------------|
| N6   | Cu1  | N1   | 176.7 (3) | F16  | C30  | F17  | 107.6 (11) |
| N3   | Cu2  | N2   | 178.1 (3) | F16  | C30  | F18  | 105.1 (10) |
| N4   | Cu3  | N5   | 175.2 (3) | F16  | C30  | C27  | 112.0 (12) |
| N2   | N1   | Cu1  | 115.2 (5) | F17  | C30  | F18  | 107.2 (12) |
| C1   | N1   | Cu1  | 136.7 (5) | F17  | C30  | C27  | 112.1 (9)  |
| C1   | N1   | N2   | 108.0 (6) | F18  | C30  | C27  | 112.5 (8)  |
| N1   | N2   | Cu2  | 120.9 (5) | C32  | C31  | C22  | 118.4 (7)  |
| C3   | N2   | Cu2  | 129.8 (5) | C36  | C31  | C22  | 121.6 (7)  |
| C3   | N2   | N1   | 108.5 (6) | C36  | C31  | C32  | 119.8 (7)  |
| N4   | N3   | Cu2  | 119.4 (5) | C31  | C32  | C33  | 119.1 (8)  |
| C20  | N3   | Cu2  | 130.2 (5) | C32  | C33  | C37  | 119.1 (8)  |
| C20  | N3   | N4   | 108.9 (6) | C34  | C33  | C32  | 121.3 (8)  |
| N3   | N4   | Cu3  | 116.6 (5) | C34  | C33  | C37  | 119.5 (8)  |
| C22  | N4   | Cu3  | 135.8 (6) | C33  | C34  | C35  | 118.8 (8)  |
| C22  | N4   | N3   | 107.4 (6) | C34  | C35  | C36  | 121.7 (8)  |
| N6   | N5   | Cu3  | 118.4 (5) | C34  | C35  | C38  | 118.6 (8)  |
| C39  | N5   | Cu3  | 130.8 (6) | C36  | C35  | C38  | 119.7 (8)  |
| C39  | N5   | N6   | 108.6 (6) | C35  | C36  | C31  | 119.2 (8)  |
| N5   | N6   | Cu1  | 118.4 (5) | F19  | C37  | F20  | 108.4 (10) |
| C41  | N6   | Cu1  | 131.3 (6) | F19  | C37  | F21  | 105.9 (8)  |
| C41  | N6   | N5   | 107.2 (6) | F19  | C37  | C33  | 113.3 (8)  |
| N1   | C1   | C2   | 108.8 (7) | F20  | C37  | F21  | 103.1 (9)  |
| N1   | C1   | C4   | 122.9 (7) | F20  | C37  | C33  | 113.7 (8)  |
| C2   | C1   | C4   | 128.2 (7) | F21  | C37  | C33  | 111.7 (8)  |
| C3   | C2   | C1   | 105.8 (7) | F22  | C38  | C35  | 112.2 (7)  |
| N2   | C3   | C2   | 109.0 (7) | F23  | C38  | F22  | 106.3 (7)  |
| N2   | C3   | C12  | 121.4 (7) | F23  | C38  | C35  | 111.3 (8)  |
| C2   | C3   | C12  | 129.6 (7) | F24  | C38  | F22  | 107.4 (8)  |
| C5   | C4   | C1   | 121.9 (7) | F24  | C38  | F23  | 107.3 (7)  |
| C5   | C4   | C9   | 119.8 (7) | F24  | C38  | C35  | 112.1 (8)  |
| C9   | C4   | C1   | 118.2 (7) | N5   | C39  | C40  | 108.5 (7)  |
| C4   | C5   | C6   | 119.7 (8) | N5   | C39  | C42  | 123.0 (7)  |
| C5   | C6   | C7   | 120.7 (8) | C40  | C39  | C42  | 128.5 (7)  |
| C5   | C6   | C10  | 119.8 (8) | C41  | C40  | C39  | 105.7 (7)  |



|     |     |     |           |      |     |      |           |
|-----|-----|-----|-----------|------|-----|------|-----------|
| C7  | C6  | C10 | 119.3(8)  | N6   | C41 | C40  | 110.0(7)  |
| C8  | C7  | C6  | 118.9(8)  | N6   | C41 | C50  | 121.4(7)  |
| C7  | C8  | C9  | 121.1(8)  | C40  | C41 | C50  | 128.5(7)  |
| C7  | C8  | C11 | 119.0(7)  | C43  | C42 | C39  | 121.6(7)  |
| C9  | C8  | C11 | 119.9(8)  | C43  | C42 | C47  | 118.7(7)  |
| C4  | C9  | C8  | 119.8(8)  | C47  | C42 | C39  | 119.7(8)  |
| F1  | C10 | F3  | 106.8(8)  | C42  | C43 | C44  | 120.1(8)  |
| F1  | C10 | C6  | 111.8(7)  | C43  | C44 | C48  | 119.8(8)  |
| F2  | C10 | F1  | 105.9(9)  | C45  | C44 | C43  | 121.6(8)  |
| F2  | C10 | F3  | 105.9(8)  | C45  | C44 | C48  | 118.6(8)  |
| F2  | C10 | C6  | 113.4(7)  | C44  | C45 | C46  | 118.2(8)  |
| F3  | C10 | C6  | 112.5(9)  | C45  | C46 | C47  | 121.3(8)  |
| F4  | C11 | F6  | 105.4(7)  | C45  | C46 | C49  | 119.5(8)  |
| F4  | C11 | C8  | 112.6(8)  | C47  | C46 | C49  | 119.2(8)  |
| F5  | C11 | F4  | 105.8(8)  | C46  | C47 | C42  | 120.1(8)  |
| F5  | C11 | F6  | 106.8(8)  | F25  | C48 | F26  | 106.8(10) |
| F5  | C11 | C8  | 114.2(7)  | F25  | C48 | F27  | 108.5(10) |
| F6  | C11 | C8  | 111.3(8)  | F25  | C48 | C44  | 112.5(8)  |
| C13 | C12 | C3  | 119.8(8)  | F26  | C48 | C44  | 111.3(9)  |
| C13 | C12 | C17 | 119.4(8)  | F27  | C48 | F26  | 104.6(8)  |
| C17 | C12 | C3  | 120.8(8)  | F27  | C48 | C44  | 112.6(9)  |
| C14 | C13 | C12 | 119.7(8)  | F28  | C49 | F30  | 96(3)     |
| C13 | C14 | C18 | 120.3(9)  | F28  | C49 | C46  | 105(2)    |
| C15 | C14 | C13 | 121.1(9)  | F29  | C49 | F28  | 117(3)    |
| C15 | C14 | C18 | 118.6(8)  | F29  | C49 | F30  | 105.1(17) |
| C14 | C15 | C16 | 120.1(8)  | F29  | C49 | C46  | 120.9(14) |
| C15 | C16 | C17 | 118.5(8)  | F30  | C49 | C46  | 109.8(10) |
| C15 | C16 | C19 | 120.9(8)  | F29A | C49 | C46  | 108.1(11) |
| C17 | C16 | C19 | 120.6(8)  | F28A | C49 | C46  | 117.2(19) |
| C12 | C17 | C16 | 121.1(8)  | F28A | C49 | F29A | 99(3)     |
| F7  | C18 | F9  | 106.4(10) | F30A | C49 | C46  | 113.6(10) |
| F7  | C18 | C14 | 113.1(8)  | F30A | C49 | F29A | 102.6(12) |
| F8  | C18 | F7  | 107.7(9)  | F30A | C49 | F28A | 113.6(19) |
| F8  | C18 | F9  | 106.1(9)  | C51  | C50 | C41  | 118.7(7)  |
| F8  | C18 | C14 | 112.4(10) | C55  | C50 | C41  | 122.0(7)  |
| F9  | C18 | C14 | 110.7(9)  | C55  | C50 | C51  | 119.2(7)  |
| F10 | C19 | F11 | 98.4(10)  | C52  | C51 | C50  | 120.7(8)  |
| F10 | C19 | C16 | 116.1(9)  | C51  | C52 | C53  | 120.4(8)  |
| F11 | C19 | C16 | 110.6(9)  | C51  | C52 | C56  | 120.3(8)  |
| F12 | C19 | F10 | 110.6(12) | C53  | C52 | C56  | 119.3(8)  |
| F12 | C19 | F11 | 104.0(11) | C54  | C53 | C52  | 118.6(8)  |

|      |     |      |           |     |     |     |           |
|------|-----|------|-----------|-----|-----|-----|-----------|
| F12  | C19 | C16  | 115.2(12) | C53 | C54 | C55 | 121.7(8)  |
| F11A | C19 | C16  | 112.7(10) | C53 | C54 | C57 | 119.0(8)  |
| F11A | C19 | F12A | 98.5(10)  | C55 | C54 | C57 | 119.3(8)  |
| F12A | C19 | C16  | 112.3(9)  | C50 | C55 | C54 | 119.4(8)  |
| F10A | C19 | C16  | 117.7(10) | F31 | C56 | F32 | 106.2(9)  |
| F10A | C19 | F11A | 106.0(11) | F31 | C56 | F33 | 108.3(10) |
| F10A | C19 | F12A | 107.8(11) | F31 | C56 | C52 | 113.2(9)  |
| N3   | C20 | C21  | 109.2(7)  | F32 | C56 | F33 | 102.7(10) |
| N3   | C20 | C23  | 122.2(7)  | F32 | C56 | C52 | 113.7(8)  |
| C21  | C20 | C23  | 128.5(7)  | F33 | C56 | C52 | 112.1(8)  |
| C22  | C21 | C20  | 104.1(7)  | F34 | C57 | C54 | 112.8(8)  |
| N4   | C22 | C21  | 110.4(7)  | F35 | C57 | F34 | 106.5(9)  |
| N4   | C22 | C31  | 122.6(7)  | F35 | C57 | F36 | 107.2(10) |
| C21  | C22 | C31  | 127.0(7)  | F35 | C57 | C54 | 112.8(8)  |
| C24  | C23 | C20  | 120.6(7)  | F36 | C57 | F34 | 102.9(9)  |
| C28  | C23 | C20  | 120.7(7)  | F36 | C57 | C54 | 113.8(7)  |
| C28  | C23 | C24  | 118.7(8)  | C59 | C58 | C64 | 118.6(11) |
| C25  | C24 | C23  | 120.0(8)  | C63 | C58 | C59 | 115.6(10) |
| C24  | C25 | C29  | 119.0(9)  | C63 | C58 | C64 | 125.8(12) |
| C26  | C25 | C24  | 120.7(8)  | C60 | C59 | C58 | 122.8(12) |
| C26  | C25 | C29  | 120.3(8)  | C59 | C60 | C61 | 120.2(13) |
| C27  | C26 | C25  | 119.4(8)  | C62 | C61 | C60 | 121.9(13) |
| C26  | C27 | C28  | 120.2(8)  | C61 | C62 | C63 | 118.0(12) |
| C26  | C27 | C30  | 118.8(8)  | C58 | C63 | C62 | 121.3(12) |
| C28  | C27 | C30  | 121.0(9)  | C1C | C1B | C1A | 120.6(14) |
| C23  | C28 | C27  | 121.1(8)  | C1G | C1B | C1A | 120.4(15) |
| F13  | C29 | F15  | 104.4(9)  | C1G | C1B | C1C | 119.0(13) |
| F13  | C29 | C25  | 113.6(8)  | C1D | C1C | C1B | 120.4(14) |
| F14  | C29 | F13  | 105.8(10) | C1C | C1D | C1E | 120.3(14) |
| F14  | C29 | F15  | 107.4(10) | C1D | C1E | C1F | 119.1(14) |
| F14  | C29 | C25  | 112.8(9)  | C1G | C1F | C1E | 120.6(14) |
| F15  | C29 | C25  | 112.2(9)  | C1F | C1G | C1B | 120.5(14) |

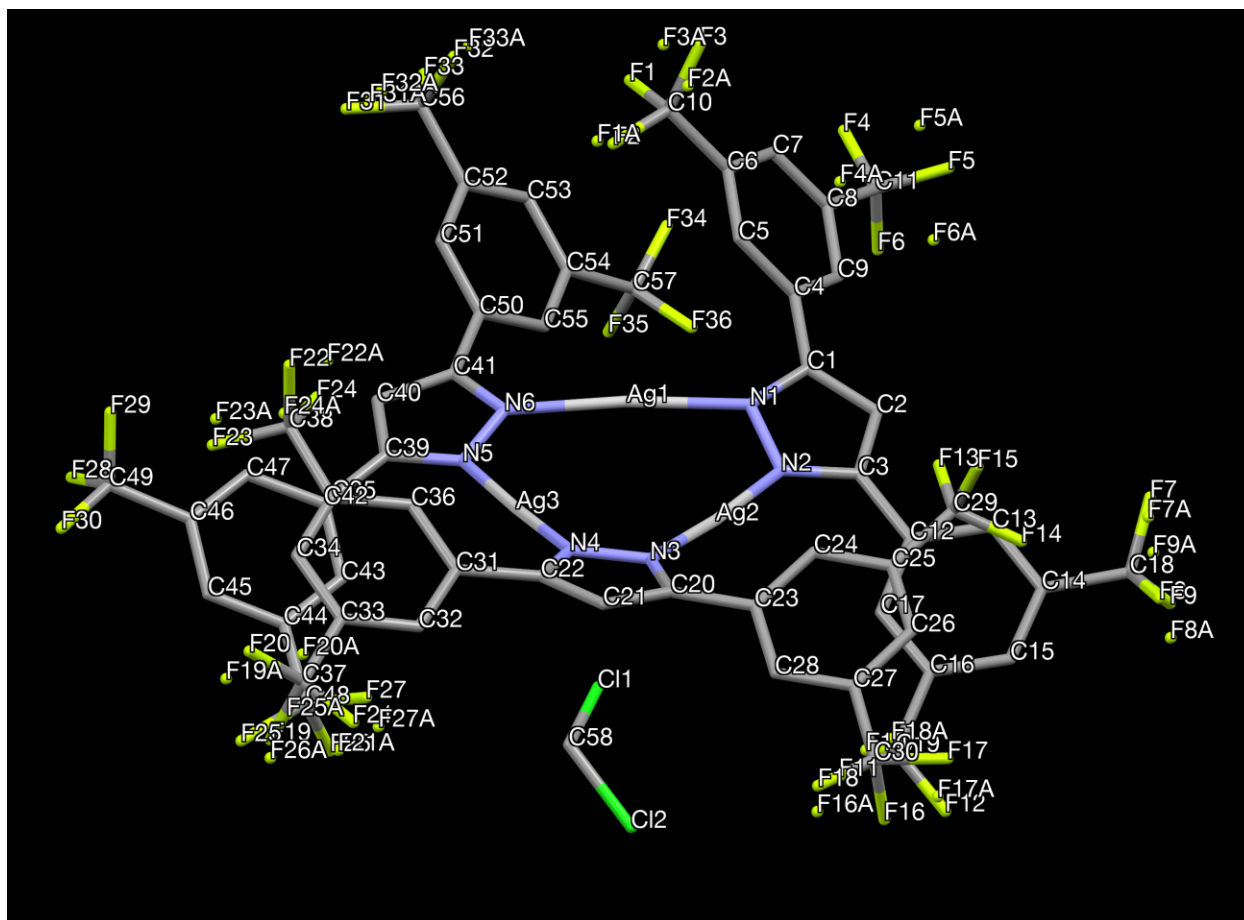

**Figure S27.** Molecular structure and atom labeling scheme of {[3,5-(3,5-(CF<sub>3</sub>)<sub>2</sub>Ph)<sub>2</sub>Pz]Ag}<sub>3</sub>•CH<sub>2</sub>Cl<sub>2</sub>

**Table S9.** Crystal data and structure refinement for {[3,5-(3,5-(CF<sub>3</sub>)<sub>2</sub>Ph)<sub>2</sub>Pz]Ag}<sub>3</sub>•CH<sub>2</sub>Cl<sub>2</sub>.

|                       |                                                                                                |
|-----------------------|------------------------------------------------------------------------------------------------|
| Identification code   | Rad378                                                                                         |
| Empirical formula     | C <sub>58</sub> H <sub>23</sub> Ag <sub>3</sub> Cl <sub>2</sub> F <sub>36</sub> N <sub>6</sub> |
| Formula weight        | 1882.33                                                                                        |
| Temperature/K         | 299.06                                                                                         |
| Crystal system        | triclinic                                                                                      |
| Space group           | P-1                                                                                            |
| a/Å                   | 8.6941(5)                                                                                      |
| b/Å                   | 15.8573(8)                                                                                     |
| c/Å                   | 26.1433(13)                                                                                    |
| α/°                   | 89.287(2)                                                                                      |
| β/°                   | 85.728(2)                                                                                      |
| γ/°                   | 87.428(2)                                                                                      |
| Volume/Å <sup>3</sup> | 3590.5(3)                                                                                      |
| Z                     | 2                                                                                              |

|                                                |                                                                |
|------------------------------------------------|----------------------------------------------------------------|
| $\rho_{\text{calc}}/\text{cm}^3$               | 1.741                                                          |
| $\mu/\text{mm}^{-1}$                           | 1.019                                                          |
| F(000)                                         | 1824.0                                                         |
| Crystal size/ $\text{mm}^3$                    | $0.19 \times 0.15 \times 0.09$                                 |
| Radiation                                      | MoK $\alpha$ ( $\lambda = 0.71073$ )                           |
| 2 $\theta$ range for data collection/ $^\circ$ | 5.768 to 52.998                                                |
| Index ranges                                   | $-10 \leq h \leq 10, -19 \leq k \leq 19, -32 \leq l \leq 32$   |
| Reflections collected                          | 37199                                                          |
| Independent reflections                        | 14836 [ $R_{\text{int}} = 0.0332, R_{\text{sigma}} = 0.0407$ ] |
| Data/restraints/parameters                     | 14836/1905/1170                                                |
| Goodness-of-fit on $F^2$                       | 1.029                                                          |
| Final R indexes [ $I \geq 2\sigma(I)$ ]        | $R_1 = 0.0615, wR_2 = 0.1723$                                  |
| Final R indexes [all data]                     | $R_1 = 0.0923, wR_2 = 0.1945$                                  |
| Largest diff. peak/hole / $e \text{ \AA}^{-3}$ | 1.06/-0.75                                                     |

**Table S10. Bond Lengths for  $\{[3,5-(3,5-(\text{CF}_3)_2\text{Ph})_2\text{Pz}]\text{Ag}\}_3 \cdot \text{CH}_2\text{Cl}_2$**

| Atom | Atom | Length/ $\text{\AA}$ | Atom | Atom | Length/ $\text{\AA}$ |
|------|------|----------------------|------|------|----------------------|
| Ag1  | N1   | 2.082 (4)            | N2   | C3   | 1.343 (7)            |
| Ag1  | N6   | 2.072 (4)            | N3   | N4   | 1.355 (6)            |
| Ag2  | Ag3  | 3.3676 (6)           | N3   | C20  | 1.356 (8)            |
| Ag2  | N2   | 2.076 (5)            | N4   | C22  | 1.333 (7)            |
| Ag2  | N3   | 2.087 (5)            | N5   | N6   | 1.356 (6)            |
| Ag3  | N4   | 2.088 (5)            | N5   | C39  | 1.346 (7)            |
| Ag3  | N5   | 2.076 (5)            | N6   | C41  | 1.327 (7)            |
| F10  | C19  | 1.298 (5)            | C1   | C2   | 1.386 (8)            |
| F11  | C19  | 1.309 (5)            | C1   | C4   | 1.465 (9)            |
| F12  | C19  | 1.310 (5)            | C2   | C3   | 1.372 (8)            |
| F13  | C29  | 1.309 (5)            | C3   | C12  | 1.477 (9)            |
| F14  | C29  | 1.311 (5)            | C4   | C5   | 1.394 (9)            |
| F15  | C29  | 1.299 (5)            | C4   | C9   | 1.389 (8)            |
| F28  | C49  | 1.313 (5)            | C5   | C6   | 1.359 (10)           |
| F29  | C49  | 1.307 (5)            | C6   | C7   | 1.393 (10)           |
| F30  | C49  | 1.304 (5)            | C6   | C10  | 1.512 (11)           |
| F34  | C57  | 1.306 (5)            | C7   | C8   | 1.355 (10)           |
| F35  | C57  | 1.306 (5)            | C8   | C9   | 1.384 (9)            |
| F36  | C57  | 1.304 (5)            | C8   | C11  | 1.490 (9)            |
| F1   | C10  | 1.318 (6)            | C12  | C13  | 1.400 (8)            |
| F2   | C10  | 1.311 (6)            | C12  | C17  | 1.385 (9)            |
| F3   | C10  | 1.304 (6)            | C13  | C14  | 1.404 (10)           |
| F4   | C11  | 1.317 (6)            | C14  | C15  | 1.359 (11)           |
| F5   | C11  | 1.302 (6)            | C14  | C18  | 1.503 (11)           |

|      |     |           |     |     |            |
|------|-----|-----------|-----|-----|------------|
| F6   | C11 | 1.308 (6) | C15 | C16 | 1.368 (11) |
| F7   | C18 | 1.308 (6) | C16 | C17 | 1.373 (10) |
| F8   | C18 | 1.317 (6) | C16 | C19 | 1.500 (11) |
| F9   | C18 | 1.295 (6) | C20 | C21 | 1.367 (8)  |
| F16  | C30 | 1.325 (6) | C20 | C23 | 1.469 (8)  |
| F17  | C30 | 1.303 (6) | C21 | C22 | 1.383 (8)  |
| F18  | C30 | 1.301 (6) | C22 | C31 | 1.473 (8)  |
| F19  | C37 | 1.313 (6) | C23 | C24 | 1.388 (9)  |
| F20  | C37 | 1.307 (5) | C23 | C28 | 1.382 (9)  |
| F21  | C37 | 1.316 (6) | C24 | C25 | 1.373 (9)  |
| F22  | C38 | 1.338 (6) | C25 | C26 | 1.355 (11) |
| F23  | C38 | 1.352 (6) | C25 | C29 | 1.449 (10) |
| F24  | C38 | 1.350 (6) | C26 | C27 | 1.384 (11) |
| F25  | C48 | 1.304 (6) | C27 | C28 | 1.386 (9)  |
| F26  | C48 | 1.302 (6) | C27 | C30 | 1.491 (11) |
| F27  | C48 | 1.312 (6) | C31 | C32 | 1.390 (8)  |
| F31  | C56 | 1.305 (6) | C31 | C36 | 1.385 (9)  |
| F32  | C56 | 1.313 (6) | C32 | C33 | 1.361 (8)  |
| F33  | C56 | 1.310 (6) | C33 | C34 | 1.364 (10) |
| F1A  | C10 | 1.309 (5) | C33 | C37 | 1.520 (10) |
| F2A  | C10 | 1.317 (6) | C34 | C35 | 1.375 (11) |
| F3A  | C10 | 1.310 (6) | C35 | C36 | 1.385 (9)  |
| F4A  | C11 | 1.302 (6) | C35 | C38 | 1.457 (11) |
| F5A  | C11 | 1.311 (6) | C39 | C40 | 1.370 (8)  |
| F6A  | C11 | 1.315 (6) | C39 | C42 | 1.478 (7)  |
| F7A  | C18 | 1.297 (6) | C40 | C41 | 1.389 (7)  |
| F8A  | C18 | 1.300 (6) | C41 | C50 | 1.488 (7)  |
| F9A  | C18 | 1.325 (6) | C42 | C43 | 1.384 (9)  |
| F16A | C30 | 1.310 (6) | C42 | C47 | 1.396 (8)  |
| F17A | C30 | 1.295 (6) | C43 | C44 | 1.391 (8)  |
| F18A | C30 | 1.325 (6) | C44 | C45 | 1.376 (10) |
| F19A | C37 | 1.310 (6) | C44 | C48 | 1.490 (10) |
| F20A | C37 | 1.317 (6) | C45 | C46 | 1.384 (11) |
| F21A | C37 | 1.305 (6) | C46 | C47 | 1.376 (8)  |
| F22A | C38 | 1.378 (7) | C46 | C49 | 1.486 (10) |
| F23A | C38 | 1.351 (7) | C50 | C51 | 1.372 (8)  |
| F24A | C38 | 1.325 (7) | C50 | C55 | 1.394 (8)  |
| F25A | C48 | 1.300 (5) | C51 | C52 | 1.382 (9)  |
| F26A | C48 | 1.313 (6) | C52 | C53 | 1.361 (10) |
| F27A | C48 | 1.306 (6) | C52 | C56 | 1.526 (10) |
| F31A | C56 | 1.309 (6) | C53 | C54 | 1.380 (9)  |

|      |     |           |     |     |           |
|------|-----|-----------|-----|-----|-----------|
| F32A | C56 | 1.313 (6) | C54 | C55 | 1.377 (8) |
| F33A | C56 | 1.305 (6) | C54 | C57 | 1.500 (9) |
| N1   | N2  | 1.369 (7) | Cl1 | C58 | 1.761 (2) |
| N1   | C1  | 1.347 (7) | Cl2 | C58 | 1.759 (2) |

**Table S11. Bond Angles for {[3,5-(3,5-(CF<sub>3</sub>)<sub>2</sub>Ph)<sub>2</sub>Pz]Ag}<sub>3</sub>•CH<sub>2</sub>Cl<sub>2</sub>.**

| Atom | Atom | Atom | Angle/°     | Atom | Atom | Atom | Angle/°    |
|------|------|------|-------------|------|------|------|------------|
| N6   | Ag1  | N1   | 174.7 (2)   | F15  | C29  | F13  | 109.7 (8)  |
| N2   | Ag2  | Ag3  | 118.75 (14) | F15  | C29  | F14  | 100.8 (7)  |
| N2   | Ag2  | N3   | 174.2 (2)   | F15  | C29  | C25  | 113.6 (6)  |
| N3   | Ag2  | Ag3  | 61.12 (14)  | F16  | C30  | C27  | 109.8 (8)  |
| N4   | Ag3  | Ag2  | 61.18 (12)  | F17  | C30  | F16  | 95.3 (10)  |
| N5   | Ag3  | Ag2  | 118.87 (12) | F17  | C30  | C27  | 112.0 (8)  |
| N5   | Ag3  | N4   | 177.1 (2)   | F18  | C30  | F16  | 102.0 (10) |
| N2   | N1   | Ag1  | 116.8 (3)   | F18  | C30  | F17  | 120.2 (11) |
| C1   | N1   | Ag1  | 131.0 (4)   | F18  | C30  | C27  | 114.7 (8)  |
| C1   | N1   | N2   | 108.2 (5)   | F16A | C30  | F18A | 103.9 (11) |
| N1   | N2   | Ag2  | 116.5 (3)   | F16A | C30  | C27  | 116.0 (9)  |
| C3   | N2   | Ag2  | 132.7 (4)   | F17A | C30  | F16A | 107.9 (13) |
| C3   | N2   | N1   | 107.9 (5)   | F17A | C30  | F18A | 103.0 (12) |
| N4   | N3   | Ag2  | 118.8 (4)   | F17A | C30  | C27  | 116.3 (10) |
| N4   | N3   | C20  | 108.4 (4)   | F18A | C30  | C27  | 108.2 (8)  |
| C20  | N3   | Ag2  | 132.7 (4)   | C32  | C31  | C22  | 120.8 (5)  |
| N3   | N4   | Ag3  | 118.6 (3)   | C36  | C31  | C22  | 121.5 (6)  |
| C22  | N4   | Ag3  | 132.9 (4)   | C36  | C31  | C32  | 117.6 (5)  |
| C22  | N4   | N3   | 108.3 (5)   | C33  | C32  | C31  | 120.6 (6)  |
| N6   | N5   | Ag3  | 119.1 (3)   | C32  | C33  | C34  | 121.8 (7)  |
| C39  | N5   | Ag3  | 130.9 (4)   | C32  | C33  | C37  | 119.3 (6)  |
| C39  | N5   | N6   | 108.0 (4)   | C34  | C33  | C37  | 118.9 (6)  |
| N5   | N6   | Ag1  | 119.7 (3)   | C33  | C34  | C35  | 118.9 (6)  |
| C41  | N6   | Ag1  | 132.4 (4)   | C34  | C35  | C36  | 119.9 (7)  |
| C41  | N6   | N5   | 107.9 (4)   | C34  | C35  | C38  | 121.6 (6)  |
| N1   | C1   | C2   | 108.5 (5)   | C36  | C35  | C38  | 118.4 (7)  |
| N1   | C1   | C4   | 122.3 (5)   | C31  | C36  | C35  | 121.1 (7)  |
| C2   | C1   | C4   | 129.1 (5)   | F19  | C37  | F21  | 99.3 (9)   |
| C3   | C2   | C1   | 106.0 (5)   | F19  | C37  | C33  | 113.4 (7)  |
| N2   | C3   | C2   | 109.3 (5)   | F20  | C37  | F19  | 108.9 (10) |
| N2   | C3   | C12  | 122.0 (5)   | F20  | C37  | F21  | 107.7 (10) |
| C2   | C3   | C12  | 128.7 (5)   | F20  | C37  | C33  | 112.4 (8)  |

|     |     |     |           |      |     |      |           |
|-----|-----|-----|-----------|------|-----|------|-----------|
| C5  | C4  | C1  | 121.3(5)  | F21  | C37 | C33  | 114.2(7)  |
| C9  | C4  | C1  | 120.6(6)  | F19A | C37 | F20A | 99.4(13)  |
| C9  | C4  | C5  | 118.1(6)  | F19A | C37 | C33  | 106.8(9)  |
| C6  | C5  | C4  | 121.2(6)  | F20A | C37 | C33  | 107.5(10) |
| C5  | C6  | C7  | 119.6(7)  | F21A | C37 | F19A | 119.3(16) |
| C5  | C6  | C10 | 118.6(6)  | F21A | C37 | F20A | 104.6(17) |
| C7  | C6  | C10 | 121.7(7)  | F21A | C37 | C33  | 117.1(12) |
| C8  | C7  | C6  | 120.3(7)  | F22  | C38 | F23  | 107.0(6)  |
| C7  | C8  | C9  | 120.1(6)  | F22  | C38 | F24  | 106.0(7)  |
| C7  | C8  | C11 | 120.8(7)  | F22  | C38 | C35  | 116.7(8)  |
| C9  | C8  | C11 | 119.0(7)  | F23  | C38 | C35  | 109.5(9)  |
| C8  | C9  | C4  | 120.6(6)  | F24  | C38 | F23  | 104.6(6)  |
| F1  | C10 | C6  | 106.7(12) | F24  | C38 | C35  | 112.2(8)  |
| F2  | C10 | F1  | 105(2)    | F22A | C38 | C35  | 108.8(8)  |
| F2  | C10 | C6  | 112.5(16) | F23A | C38 | F22A | 101.5(6)  |
| F3  | C10 | F1  | 98.0(16)  | F23A | C38 | C35  | 114.8(8)  |
| F3  | C10 | F2  | 118(2)    | F24A | C38 | F22A | 105.7(7)  |
| F3  | C10 | C6  | 114.0(12) | F24A | C38 | F23A | 108.0(7)  |
| F1A | C10 | F2A | 105.9(9)  | F24A | C38 | C35  | 116.6(8)  |
| F1A | C10 | F3A | 109.0(10) | N5   | C39 | C40  | 109.6(4)  |
| F1A | C10 | C6  | 111.5(7)  | N5   | C39 | C42  | 121.0(5)  |
| F2A | C10 | C6  | 111.6(7)  | C40  | C39 | C42  | 129.4(5)  |
| F3A | C10 | F2A | 105.1(10) | C39  | C40 | C41  | 104.5(5)  |
| F3A | C10 | C6  | 113.2(8)  | N6   | C41 | C40  | 110.0(5)  |
| F4  | C11 | C8  | 110.4(7)  | N6   | C41 | C50  | 122.2(5)  |
| F5  | C11 | F4  | 107.1(9)  | C40  | C41 | C50  | 127.9(5)  |
| F5  | C11 | F6  | 108.4(10) | C43  | C42 | C39  | 121.0(5)  |
| F5  | C11 | C8  | 113.3(7)  | C43  | C42 | C47  | 118.6(5)  |
| F6  | C11 | F4  | 105.4(10) | C47  | C42 | C39  | 120.3(5)  |
| F6  | C11 | C8  | 111.8(7)  | C42  | C43 | C44  | 120.8(6)  |
| F4A | C11 | F5A | 108.8(13) | C43  | C44 | C48  | 119.1(6)  |
| F4A | C11 | F6A | 105.5(13) | C45  | C44 | C43  | 119.9(7)  |
| F4A | C11 | C8  | 118.9(9)  | C45  | C44 | C48  | 121.0(6)  |
| F5A | C11 | F6A | 97.7(12)  | C44  | C45 | C46  | 119.7(6)  |
| F5A | C11 | C8  | 110.1(9)  | C45  | C46 | C49  | 121.5(6)  |
| F6A | C11 | C8  | 113.7(8)  | C47  | C46 | C45  | 120.6(6)  |
| C13 | C12 | C3  | 119.3(6)  | C47  | C46 | C49  | 117.8(7)  |
| C17 | C12 | C3  | 122.1(5)  | C46  | C47 | C42  | 120.3(6)  |
| C17 | C12 | C13 | 118.5(6)  | F25  | C48 | F27  | 120.7(12) |
| C12 | C13 | C14 | 119.3(7)  | F25  | C48 | C44  | 109.3(9)  |
| C13 | C14 | C18 | 117.2(7)  | F26  | C48 | F25  | 98.8(12)  |

|     |     |     |           |      |     |      |           |
|-----|-----|-----|-----------|------|-----|------|-----------|
| C15 | C14 | C13 | 120.2(7)  | F26  | C48 | F27  | 104.6(11) |
| C15 | C14 | C18 | 122.6(7)  | F26  | C48 | C44  | 111.4(8)  |
| C14 | C15 | C16 | 120.7(7)  | F27  | C48 | C44  | 111.1(8)  |
| C15 | C16 | C17 | 120.1(7)  | F25A | C48 | F26A | 108.0(9)  |
| C15 | C16 | C19 | 120.1(7)  | F25A | C48 | F27A | 110.6(10) |
| C17 | C16 | C19 | 119.8(7)  | F25A | C48 | C44  | 115.4(7)  |
| C16 | C17 | C12 | 121.1(6)  | F26A | C48 | C44  | 108.3(8)  |
| F7  | C18 | F8  | 100.3(12) | F27A | C48 | F26A | 96.6(10)  |
| F7  | C18 | C14 | 115.2(8)  | F27A | C48 | C44  | 115.9(7)  |
| F8  | C18 | C14 | 109.3(9)  | F28  | C49 | C46  | 113.7(6)  |
| F9  | C18 | F7  | 107.2(11) | F29  | C49 | F28  | 103.6(6)  |
| F9  | C18 | F8  | 108.8(12) | F29  | C49 | C46  | 112.6(6)  |
| F9  | C18 | C14 | 115.0(9)  | F30  | C49 | F28  | 103.3(7)  |
| F7A | C18 | F8A | 116.1(12) | F30  | C49 | F29  | 109.3(6)  |
| F7A | C18 | F9A | 110.5(13) | F30  | C49 | C46  | 113.4(6)  |
| F7A | C18 | C14 | 112.0(9)  | C51  | C50 | C41  | 119.8(5)  |
| F8A | C18 | F9A | 97.1(12)  | C51  | C50 | C55  | 118.9(5)  |
| F8A | C18 | C14 | 111.6(9)  | C55  | C50 | C41  | 121.3(5)  |
| F9A | C18 | C14 | 108.5(10) | C50  | C51 | C52  | 120.7(6)  |
| F10 | C19 | F11 | 106.1(8)  | C51  | C52 | C56  | 118.0(6)  |
| F10 | C19 | F12 | 106.8(8)  | C53  | C52 | C51  | 120.3(6)  |
| F10 | C19 | C16 | 111.4(7)  | C53  | C52 | C56  | 121.5(6)  |
| F11 | C19 | F12 | 101.6(8)  | C52  | C53 | C54  | 119.8(6)  |
| F11 | C19 | C16 | 114.1(6)  | C53  | C54 | C57  | 121.5(5)  |
| F12 | C19 | C16 | 116.0(7)  | C55  | C54 | C53  | 120.3(6)  |
| N3  | C20 | C21 | 108.1(5)  | C55  | C54 | C57  | 118.2(6)  |
| N3  | C20 | C23 | 121.3(5)  | C54  | C55 | C50  | 120.0(6)  |
| C21 | C20 | C23 | 130.6(6)  | F31  | C56 | F32  | 105.3(10) |
| C20 | C21 | C22 | 106.4(5)  | F31  | C56 | F33  | 107.4(12) |
| N4  | C22 | C21 | 108.8(5)  | F31  | C56 | C52  | 114.7(7)  |
| N4  | C22 | C31 | 121.6(5)  | F32  | C56 | C52  | 110.1(8)  |
| C21 | C22 | C31 | 129.5(5)  | F33  | C56 | F32  | 110.2(12) |
| C24 | C23 | C20 | 121.6(6)  | F33  | C56 | C52  | 109.1(9)  |
| C28 | C23 | C20 | 119.5(5)  | F31A | C56 | F32A | 107.0(12) |
| C28 | C23 | C24 | 118.9(6)  | F31A | C56 | C52  | 110.9(8)  |
| C25 | C24 | C23 | 120.6(7)  | F32A | C56 | C52  | 114.0(9)  |
| C24 | C25 | C29 | 121.0(7)  | F33A | C56 | F31A | 102.5(11) |
| C26 | C25 | C24 | 120.3(7)  | F33A | C56 | F32A | 109.9(12) |
| C26 | C25 | C29 | 118.7(6)  | F33A | C56 | C52  | 111.9(8)  |
| C25 | C26 | C27 | 120.5(6)  | F34  | C57 | F35  | 106.4(5)  |
| C26 | C27 | C28 | 119.5(7)  | F34  | C57 | C54  | 113.2(6)  |



|     |     |     |           |     |     |     |           |
|-----|-----|-----|-----------|-----|-----|-----|-----------|
| C26 | C27 | C30 | 121.4 (6) | F35 | C57 | C54 | 111.2 (5) |
| C28 | C27 | C30 | 119.1 (6) | F36 | C57 | F34 | 104.9 (6) |
| C23 | C28 | C27 | 120.2 (6) | F36 | C57 | F35 | 107.2 (6) |
| F13 | C29 | F14 | 99.2 (7)  | F36 | C57 | C54 | 113.3 (5) |
| F13 | C29 | C25 | 115.5 (6) | Cl2 | C58 | Cl1 | 111.8 (3) |
| F14 | C29 | C25 | 116.2 (7) |     |     |     |           |

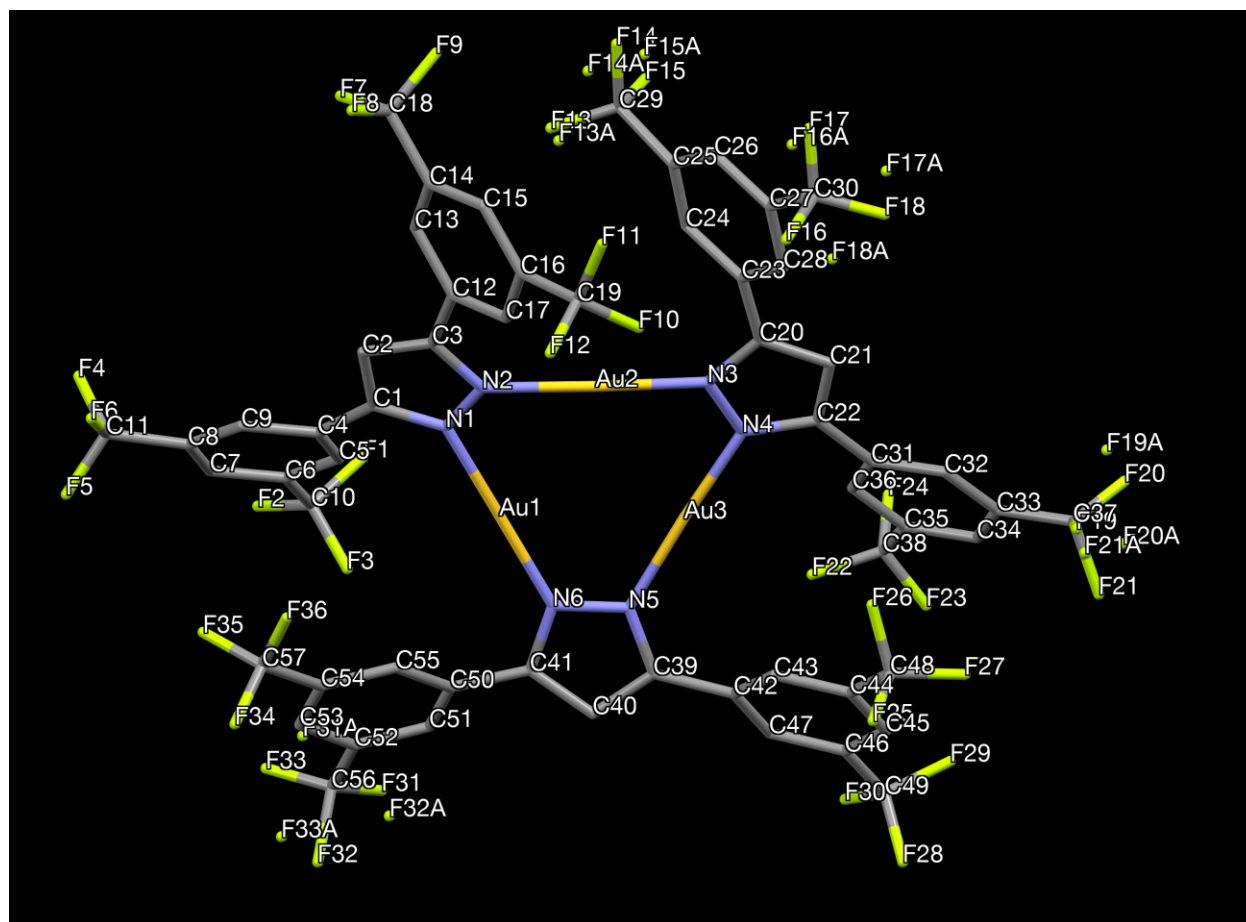

**Figure S28.** Molecular structure and atom labeling scheme of {[3,5-(3,5-(CF<sub>3</sub>)<sub>2</sub>Ph)<sub>2</sub>Pz]Au}<sub>3</sub>

**Table S12.** Crystal data and structure refinement for {[3,5-(3,5-(CF<sub>3</sub>)<sub>2</sub>Ph)<sub>2</sub>Pz]Au}<sub>3</sub>

|                     |                                                                                |
|---------------------|--------------------------------------------------------------------------------|
| Identification code | Rad533                                                                         |
| Empirical formula   | C <sub>57</sub> H <sub>21</sub> Au <sub>3</sub> F <sub>36</sub> N <sub>6</sub> |
| Formula weight      | 2064.70                                                                        |
| Temperature/K       | 100.0                                                                          |

|                                             |                                                                |
|---------------------------------------------|----------------------------------------------------------------|
| Crystal system                              | monoclinic                                                     |
| Space group                                 | P2 <sub>1</sub> /c                                             |
| a/Å                                         | 8.3667(5)                                                      |
| b/Å                                         | 31.7232(19)                                                    |
| c/Å                                         | 25.7197(15)                                                    |
| α/°                                         | 90                                                             |
| β/°                                         | 91.507(2)                                                      |
| γ/°                                         | 90                                                             |
| Volume/Å <sup>3</sup>                       | 6824.1(7)                                                      |
| Z                                           | 4                                                              |
| ρ <sub>calc</sub> /cm <sup>3</sup>          | 2.010                                                          |
| μ/mm <sup>-1</sup>                          | 6.573                                                          |
| F(000)                                      | 3864.0                                                         |
| Crystal size/mm <sup>3</sup>                | 0.28 × 0.15 × 0.09                                             |
| Radiation                                   | MoKα (λ = 0.71073)                                             |
| 2θ range for data collection/°              | 5.694 to 60.054                                                |
| Index ranges                                | -11 ≤ h ≤ 11, -44 ≤ k ≤ 44, -36 ≤ l ≤ 36                       |
| Reflections collected                       | 89629                                                          |
| Independent reflections                     | 19862 [R <sub>int</sub> = 0.0345, R <sub>sigma</sub> = 0.0273] |
| Data/restraints/parameters                  | 19862/366/1031                                                 |
| Goodness-of-fit on F <sup>2</sup>           | 1.069                                                          |
| Final R indexes [I >= 2σ (I)]               | R <sub>1</sub> = 0.0317, wR <sub>2</sub> = 0.0664              |
| Final R indexes [all data]                  | R <sub>1</sub> = 0.0412, wR <sub>2</sub> = 0.0702              |
| Largest diff. peak/hole / e Å <sup>-3</sup> | 1.84/-1.66                                                     |

**Table S13. Bond Lengths for {[3,5-(3,5-(CF<sub>3</sub>)<sub>2</sub>Ph)<sub>2</sub>Pz]Au}.**

| Atom | Atom | Length/Å   | Atom | Atom | Length/Å  |
|------|------|------------|------|------|-----------|
| Au1  | Au2  | 3.3693 (3) | C7   | C8   | 1.395 (6) |
| Au1  | Au3  | 3.2971 (3) | C8   | C9   | 1.392 (5) |
| Au1  | N1   | 2.010 (3)  | C8   | C11  | 1.494 (5) |
| Au1  | N6   | 2.005 (3)  | C12  | C13  | 1.393 (5) |
| Au2  | Au3  | 3.2876 (2) | C12  | C17  | 1.395 (5) |
| Au2  | N2   | 2.013 (3)  | C13  | C14  | 1.385 (6) |
| Au2  | N3   | 2.005 (3)  | C14  | C15  | 1.392 (6) |
| Au3  | N4   | 1.996 (3)  | C14  | C18  | 1.502 (6) |
| Au3  | N5   | 1.996 (3)  | C15  | C16  | 1.381 (6) |
| F1   | C10  | 1.365 (6)  | C16  | C17  | 1.395 (6) |
| F2   | C10  | 1.317 (6)  | C16  | C19  | 1.499 (6) |
| F3   | C10  | 1.307 (6)  | C20  | C21  | 1.387 (5) |
| F4   | C11  | 1.342 (5)  | C20  | C23  | 1.463 (6) |
| F5   | C11  | 1.339 (5)  | C21  | C22  | 1.388 (6) |

|     |     |            |     |      |            |
|-----|-----|------------|-----|------|------------|
| F6  | C11 | 1.334 (5)  | C22 | C31  | 1.466 (6)  |
| F7  | C18 | 1.319 (6)  | C23 | C24  | 1.395 (6)  |
| F8  | C18 | 1.303 (6)  | C23 | C28  | 1.399 (6)  |
| F9  | C18 | 1.330 (6)  | C24 | C25  | 1.391 (7)  |
| F10 | C19 | 1.329 (6)  | C25 | C26  | 1.389 (8)  |
| F11 | C19 | 1.349 (6)  | C25 | C29  | 1.471 (6)  |
| F12 | C19 | 1.305 (7)  | C26 | C27  | 1.394 (7)  |
| F13 | C29 | 1.314 (11) | C27 | C28  | 1.391 (6)  |
| F14 | C29 | 1.315 (9)  | C27 | C30  | 1.452 (6)  |
| F15 | C29 | 1.468 (10) | C29 | F13A | 1.345 (10) |
| F16 | C30 | 1.396 (9)  | C29 | F15A | 1.275 (9)  |
| F17 | C30 | 1.321 (9)  | C29 | F14A | 1.432 (10) |
| F18 | C30 | 1.300 (9)  | C30 | F16A | 1.312 (11) |
| F19 | C37 | 1.279 (9)  | C30 | F18A | 1.310 (9)  |
| F20 | C37 | 1.280 (7)  | C30 | F17A | 1.397 (9)  |
| F21 | C37 | 1.433 (9)  | C31 | C32  | 1.393 (5)  |
| F22 | C38 | 1.333 (7)  | C31 | C36  | 1.396 (6)  |
| F23 | C38 | 1.328 (6)  | C32 | C33  | 1.398 (7)  |
| F24 | C38 | 1.336 (6)  | C33 | C34  | 1.389 (8)  |
| F25 | C48 | 1.339 (6)  | C33 | C37  | 1.464 (6)  |
| F26 | C48 | 1.331 (5)  | C34 | C35  | 1.389 (7)  |
| F27 | C48 | 1.335 (6)  | C35 | C36  | 1.392 (6)  |
| F28 | C49 | 1.320 (8)  | C35 | C38  | 1.489 (8)  |
| F29 | C49 | 1.332 (7)  | C37 | F19A | 1.419 (11) |
| F30 | C49 | 1.293 (6)  | C37 | F21A | 1.259 (11) |
| F31 | C56 | 1.304 (8)  | C37 | F20A | 1.286 (9)  |
| F32 | C56 | 1.397 (7)  | C39 | C40  | 1.387 (6)  |
| F33 | C56 | 1.312 (7)  | C39 | C42  | 1.473 (5)  |
| F34 | C57 | 1.318 (5)  | C40 | C41  | 1.393 (5)  |
| F35 | C57 | 1.329 (5)  | C41 | C50  | 1.469 (5)  |
| F36 | C57 | 1.326 (5)  | C42 | C43  | 1.388 (6)  |
| N1  | N2  | 1.363 (4)  | C42 | C47  | 1.392 (6)  |
| N1  | C1  | 1.348 (4)  | C43 | C44  | 1.389 (6)  |
| N2  | C3  | 1.340 (5)  | C44 | C45  | 1.374 (6)  |
| N3  | N4  | 1.365 (5)  | C44 | C48  | 1.501 (6)  |
| N3  | C20 | 1.346 (5)  | C45 | C46  | 1.383 (6)  |
| N4  | C22 | 1.351 (5)  | C46 | C47  | 1.393 (6)  |
| N5  | N6  | 1.364 (4)  | C46 | C49  | 1.509 (6)  |
| N5  | C39 | 1.350 (5)  | C50 | C51  | 1.392 (6)  |
| N6  | C41 | 1.351 (5)  | C50 | C55  | 1.395 (5)  |
| C1  | C2  | 1.388 (5)  | C51 | C52  | 1.389 (6)  |

|    |     |           |     |      |            |
|----|-----|-----------|-----|------|------------|
| C1 | C4  | 1.474 (5) | C52 | C53  | 1.390 (6)  |
| C2 | C3  | 1.384 (5) | C52 | C56  | 1.466 (6)  |
| C3 | C12 | 1.477 (5) | C53 | C54  | 1.387 (6)  |
| C4 | C5  | 1.384 (5) | C54 | C55  | 1.385 (5)  |
| C4 | C9  | 1.397 (5) | C54 | C57  | 1.499 (5)  |
| C5 | C6  | 1.391 (6) | C56 | F33A | 1.270 (10) |
| C6 | C7  | 1.382 (5) | C56 | F32A | 1.337 (11) |
| C6 | C10 | 1.509 (6) | C56 | F31A | 1.379 (11) |

**Table S14. Bond Angles for {[3,5-(3,5-(CF<sub>3</sub>)<sub>2</sub>Ph)<sub>2</sub>Pz]Au}.**

| Atom | Atom | Atom | Angle/°     | Atom | Atom | Atom | Angle/°    |
|------|------|------|-------------|------|------|------|------------|
| Au3  | Au1  | Au2  | 59.085 (4)  | F14  | C29  | F15  | 100.6 (7)  |
| N1   | Au1  | Au2  | 59.53 (9)   | F14  | C29  | C25  | 117.2 (7)  |
| N1   | Au1  | Au3  | 118.10 (9)  | F15  | C29  | C25  | 107.2 (6)  |
| N6   | Au1  | Au2  | 119.51 (9)  | F13A | C29  | C25  | 109.5 (9)  |
| N6   | Au1  | Au3  | 61.41 (9)   | F13A | C29  | F14A | 102.2 (9)  |
| N6   | Au1  | N1   | 177.13 (14) | F15A | C29  | C25  | 116.8 (7)  |
| Au3  | Au2  | Au1  | 59.362 (6)  | F15A | C29  | F13A | 112.3 (12) |
| N2   | Au2  | Au1  | 59.14 (9)   | F15A | C29  | F14A | 106.1 (7)  |
| N2   | Au2  | Au3  | 118.43 (9)  | F14A | C29  | C25  | 108.8 (7)  |
| N3   | Au2  | Au1  | 120.10 (10) | F16  | C30  | C27  | 110.6 (5)  |
| N3   | Au2  | Au3  | 61.10 (10)  | F17  | C30  | F16  | 100.2 (8)  |
| N3   | Au2  | N2   | 176.66 (14) | F17  | C30  | C27  | 114.6 (8)  |
| Au2  | Au3  | Au1  | 61.552 (5)  | F18  | C30  | F16  | 104.4 (8)  |
| N4   | Au3  | Au1  | 121.50 (9)  | F18  | C30  | F17  | 108.8 (9)  |
| N4   | Au3  | Au2  | 61.14 (9)   | F18  | C30  | C27  | 116.5 (6)  |
| N4   | Au3  | N5   | 177.28 (14) | F16A | C30  | C27  | 117.3 (11) |
| N5   | Au3  | Au1  | 60.69 (9)   | F16A | C30  | F17A | 102.6 (10) |
| N5   | Au3  | Au2  | 120.61 (9)  | F18A | C30  | C27  | 113.6 (6)  |
| N2   | N1   | Au1  | 117.7 (2)   | F18A | C30  | F16A | 112.2 (11) |
| C1   | N1   | Au1  | 132.3 (3)   | F18A | C30  | F17A | 99.2 (9)   |
| C1   | N1   | N2   | 108.2 (3)   | F17A | C30  | C27  | 109.7 (7)  |
| N1   | N2   | Au2  | 118.5 (2)   | C32  | C31  | C22  | 119.7 (4)  |
| C3   | N2   | Au2  | 131.3 (3)   | C32  | C31  | C36  | 118.9 (4)  |
| C3   | N2   | N1   | 108.1 (3)   | C36  | C31  | C22  | 121.4 (4)  |
| N4   | N3   | Au2  | 118.1 (2)   | C31  | C32  | C33  | 120.1 (5)  |
| C20  | N3   | Au2  | 133.4 (3)   | C32  | C33  | C37  | 119.9 (5)  |
| C20  | N3   | N4   | 108.5 (3)   | C34  | C33  | C32  | 120.8 (4)  |
| N3   | N4   | Au3  | 118.6 (2)   | C34  | C33  | C37  | 119.3 (5)  |

|     |     |     |           |      |     |      |            |
|-----|-----|-----|-----------|------|-----|------|------------|
| C22 | N4  | Au3 | 131.1 (3) | C35  | C34 | C33  | 119.0 (4)  |
| C22 | N4  | N3  | 108.3 (3) | C34  | C35 | C36  | 120.5 (5)  |
| N6  | N5  | Au3 | 120.0 (2) | C34  | C35 | C38  | 120.6 (4)  |
| C39 | N5  | Au3 | 131.2 (3) | C36  | C35 | C38  | 118.8 (4)  |
| C39 | N5  | N6  | 108.6 (3) | C35  | C36 | C31  | 120.7 (4)  |
| N5  | N6  | Au1 | 117.6 (2) | F19  | C37 | F20  | 116.6 (9)  |
| C41 | N6  | Au1 | 134.0 (3) | F19  | C37 | F21  | 99.8 (8)   |
| C41 | N6  | N5  | 108.4 (3) | F19  | C37 | C33  | 113.0 (6)  |
| N1  | C1  | C2  | 109.0 (3) | F20  | C37 | F21  | 99.5 (7)   |
| N1  | C1  | C4  | 123.5 (3) | F20  | C37 | C33  | 116.2 (5)  |
| C2  | C1  | C4  | 127.4 (3) | F21  | C37 | C33  | 109.0 (6)  |
| C3  | C2  | C1  | 105.1 (3) | F19A | C37 | C33  | 108.6 (6)  |
| N2  | C3  | C2  | 109.6 (3) | F21A | C37 | C33  | 120.6 (9)  |
| N2  | C3  | C12 | 122.1 (3) | F21A | C37 | F19A | 101.0 (11) |
| C2  | C3  | C12 | 128.3 (3) | F21A | C37 | F20A | 109.1 (10) |
| C5  | C4  | C1  | 121.6 (3) | F20A | C37 | C33  | 117.7 (7)  |
| C5  | C4  | C9  | 119.1 (3) | F20A | C37 | F19A | 95.4 (10)  |
| C9  | C4  | C1  | 119.1 (3) | F22  | C38 | F24  | 106.2 (5)  |
| C4  | C5  | C6  | 120.7 (4) | F22  | C38 | C35  | 112.3 (4)  |
| C5  | C6  | C10 | 118.9 (4) | F23  | C38 | F22  | 107.8 (5)  |
| C7  | C6  | C5  | 120.7 (4) | F23  | C38 | F24  | 105.8 (4)  |
| C7  | C6  | C10 | 120.4 (4) | F23  | C38 | C35  | 112.9 (5)  |
| C6  | C7  | C8  | 118.9 (4) | F24  | C38 | C35  | 111.4 (5)  |
| C7  | C8  | C11 | 118.3 (3) | N5   | C39 | C40  | 108.6 (3)  |
| C9  | C8  | C7  | 120.6 (3) | N5   | C39 | C42  | 120.5 (4)  |
| C9  | C8  | C11 | 121.0 (4) | C40  | C39 | C42  | 130.9 (4)  |
| C8  | C9  | C4  | 120.0 (4) | C39  | C40 | C41  | 106.0 (4)  |
| F1  | C10 | C6  | 111.3 (4) | N6   | C41 | C40  | 108.5 (3)  |
| F2  | C10 | F1  | 103.1 (4) | N6   | C41 | C50  | 122.4 (3)  |
| F2  | C10 | C6  | 113.6 (4) | C40  | C41 | C50  | 129.1 (4)  |
| F3  | C10 | F1  | 103.6 (4) | C43  | C42 | C39  | 119.9 (4)  |
| F3  | C10 | F2  | 112.8 (4) | C43  | C42 | C47  | 119.0 (4)  |
| F3  | C10 | C6  | 111.7 (4) | C47  | C42 | C39  | 121.1 (4)  |
| F4  | C11 | C8  | 111.4 (3) | C42  | C43 | C44  | 120.4 (4)  |
| F5  | C11 | F4  | 106.7 (3) | C43  | C44 | C48  | 117.7 (4)  |
| F5  | C11 | C8  | 111.9 (3) | C45  | C44 | C43  | 121.0 (4)  |
| F6  | C11 | F4  | 106.4 (3) | C45  | C44 | C48  | 121.2 (4)  |
| F6  | C11 | F5  | 106.8 (3) | C44  | C45 | C46  | 118.5 (4)  |
| F6  | C11 | C8  | 113.2 (3) | C45  | C46 | C47  | 121.6 (4)  |
| C13 | C12 | C3  | 119.5 (3) | C45  | C46 | C49  | 118.0 (4)  |
| C13 | C12 | C17 | 119.0 (4) | C47  | C46 | C49  | 120.4 (4)  |

|     |     |     |           |      |     |      |            |
|-----|-----|-----|-----------|------|-----|------|------------|
| C17 | C12 | C3  | 121.4 (3) | C42  | C47 | C46  | 119.5 (4)  |
| C14 | C13 | C12 | 120.7 (4) | F25  | C48 | C44  | 111.3 (4)  |
| C13 | C14 | C15 | 120.5 (4) | F26  | C48 | F25  | 106.1 (4)  |
| C13 | C14 | C18 | 120.6 (4) | F26  | C48 | F27  | 107.2 (4)  |
| C15 | C14 | C18 | 118.9 (4) | F26  | C48 | C44  | 112.3 (4)  |
| C16 | C15 | C14 | 118.8 (4) | F27  | C48 | F25  | 106.6 (4)  |
| C15 | C16 | C17 | 121.3 (4) | F27  | C48 | C44  | 112.7 (4)  |
| C15 | C16 | C19 | 120.4 (4) | F28  | C49 | F29  | 104.2 (4)  |
| C17 | C16 | C19 | 118.2 (4) | F28  | C49 | C46  | 111.5 (5)  |
| C16 | C17 | C12 | 119.7 (4) | F29  | C49 | C46  | 110.8 (5)  |
| F7  | C18 | F9  | 105.3 (4) | F30  | C49 | F28  | 107.3 (5)  |
| F7  | C18 | C14 | 112.8 (4) | F30  | C49 | F29  | 109.7 (6)  |
| F8  | C18 | F7  | 106.9 (5) | F30  | C49 | C46  | 113.0 (4)  |
| F8  | C18 | F9  | 107.9 (5) | C51  | C50 | C41  | 119.9 (3)  |
| F8  | C18 | C14 | 112.1 (4) | C51  | C50 | C55  | 118.9 (4)  |
| F9  | C18 | C14 | 111.4 (4) | C55  | C50 | C41  | 121.1 (4)  |
| F10 | C19 | F11 | 105.6 (5) | C52  | C51 | C50  | 120.5 (4)  |
| F10 | C19 | C16 | 112.0 (4) | C51  | C52 | C53  | 120.7 (4)  |
| F11 | C19 | C16 | 111.8 (5) | C51  | C52 | C56  | 120.9 (4)  |
| F12 | C19 | F10 | 107.0 (5) | C53  | C52 | C56  | 118.4 (4)  |
| F12 | C19 | F11 | 108.1 (5) | C54  | C53 | C52  | 118.6 (4)  |
| F12 | C19 | C16 | 111.9 (5) | C53  | C54 | C57  | 118.4 (4)  |
| N3  | C20 | C21 | 108.6 (4) | C55  | C54 | C53  | 121.3 (4)  |
| N3  | C20 | C23 | 123.3 (3) | C55  | C54 | C57  | 120.3 (4)  |
| C21 | C20 | C23 | 128.0 (4) | C54  | C55 | C50  | 120.1 (4)  |
| C20 | C21 | C22 | 106.1 (3) | F31  | C56 | F32  | 103.5 (7)  |
| N4  | C22 | C21 | 108.5 (4) | F31  | C56 | F33  | 110.3 (7)  |
| N4  | C22 | C31 | 122.5 (4) | F31  | C56 | C52  | 115.4 (7)  |
| C21 | C22 | C31 | 128.9 (4) | F32  | C56 | C52  | 110.6 (5)  |
| C24 | C23 | C20 | 121.3 (4) | F33  | C56 | F32  | 99.8 (5)   |
| C24 | C23 | C28 | 119.0 (4) | F33  | C56 | C52  | 115.4 (5)  |
| C28 | C23 | C20 | 119.7 (4) | F33A | C56 | C52  | 116.2 (8)  |
| C25 | C24 | C23 | 120.2 (4) | F33A | C56 | F32A | 109.8 (12) |
| C24 | C25 | C29 | 118.5 (5) | F33A | C56 | F31A | 106.7 (11) |
| C26 | C25 | C24 | 120.8 (4) | F32A | C56 | C52  | 113.3 (11) |
| C26 | C25 | C29 | 120.6 (5) | F32A | C56 | F31A | 102.1 (10) |
| C25 | C26 | C27 | 119.4 (5) | F31A | C56 | C52  | 107.6 (7)  |
| C26 | C27 | C30 | 120.2 (5) | F34  | C57 | F35  | 104.9 (4)  |
| C28 | C27 | C26 | 120.0 (5) | F34  | C57 | F36  | 106.7 (4)  |
| C28 | C27 | C30 | 119.7 (5) | F34  | C57 | C54  | 113.2 (4)  |
| C27 | C28 | C23 | 120.7 (4) | F35  | C57 | C54  | 112.9 (4)  |

|     |     |     |           |     |     |     |          |
|-----|-----|-----|-----------|-----|-----|-----|----------|
| F13 | C29 | F14 | 109.8(9)  | F36 | C57 | F35 | 105.4(4) |
| F13 | C29 | F15 | 100.1(12) | F36 | C57 | C54 | 113.0(3) |
| F13 | C29 | C25 | 118.7(11) |     |     |     |          |
